# Supplementary material for: ESG performance and carbon emission intensity: examining the role of climate policy uncertainty and the digital economy in China’s dual-carbon era
Source: Frontiers journal article supplement (doi:10.3389/fenvs.2024.1526681), 2025-01-24
Supplement: Table_2.xls [file Table_2.xls]

## Sheet: 2 way interactions2 (DE )
This worksheet plots two-way linear interaction effects estimated via regression analysis
Enter information from your regression in the shaded cells.
You MUST enter the coefficients into cells B16-B20.
You must EITHER enter the means & SDs of the three IVs into cells B23-B26, OR enter values at which the slopes are to be plotted in cells B29-B32 (or both).
If you want simple slope tests, you MUST enter the information into cells B43-B48.
Note that simple slope tests are only recommended at specific hypothesized values of the moderator.
For further information see www.jeremydawson.co.uk/slopes.htm
	WARNING: Only type in yellow cells!
Variable names:
Name of independent variable:	ESG
Name of moderator:	DE
Name of dependent variable:	CEI
Unstandardised Regression Coefficients:
Independent variable:	-0.229
Moderator:	-15.18
Interaction:	0.69
Intercept / Constant:	23.656
Means / SDs of variables:
Mean of independent variable:	2.07025
SD of independent variable:	2.01302
Mean of moderator:	0.131407
SD of moderator:	0.10316
Values of variables at which to plot slopes*:
Low value of IV:
High value of IV:
Low value of moderator:
High value of moderator:
(* If left blank, this will automatically be done at one standard deviation above and below mean)
Optional alternative legend**:
Low value of independent variable:	lower ESG
High value of independent variable:	higher ESG
Low value of moderator:	lower DE
High value of moderator:	higher DE
(** Leave these cells blank to get the normal "low/high" legend)
SIMPLE SLOPE TESTS					Gradient of slope for lower DE	-0.20951
Variance of coefficient of IV:	0.002				t-value of slope for lower DE	-4.49476
Variance of coefficient of interaction:	0.004				p-value of slope for lower DE	1.42741e-05
Covariance of coefficients of IV and interaction:	0.003
					Gradient of slope for higher DE	-0.0671488
Sample size:	150				t-value of slope for higher DE	-1.1149
Number of control variables:	3				p-value of slope for higher DE	0.266764
Do NOT type below this line
		lower ESG	higher ESG
	lower DE	23.2152	22.3717
	higher DE	20.0914	19.8211
	Low IV:	0.057237
	High IV:	4.08327
	Low moderator:	0.028247
	High moderator:	0.234567

## Sheet: Sheet1
1. 根据stata命令运行
//绘制调节效应图//
. clear
. import excel "/Volumes/Maddie/论文发表发表发表/川轻化工作期间/2024发表/3 (数字经济)/数字经济省
> 级数据运行+结果/ESG与数字经济运行数据2011-2020.xlsx", sheet("Sheet1") firstrow
. xtset icode year
. gen interact1 = ESG*CPU
. xtreg CEI ESG CPU interact1 CV劳动力水平 CV社会消费水平 CV外商直接投资 CV对外开放水平
. ereturn list		斜率分析, 可不做
. matrix list e(V)
2. 根据命令产生的结果填写Excel
