# Supplementary material for: ESG performance and carbon emission intensity: examining the role of climate policy uncertainty and the digital economy in China’s dual-carbon era
Source: Frontiers journal article supplement (doi:10.3389/fenvs.2024.1526681), 2025-01-24
Supplement: Table_3.xlsx [file Table_3.xlsx]

## Sheet: Sheet1
icode	year	area	地区	CEI	CPU	ESG	E	S	G	DEshangzhi	DEzhuchengfen	CV劳动力水平	CV社会消费水平	CV外商直接投资	CV对外开放水平
1	2011	Beijing	北京	2.82915	2.34475	17.8988	9.65904	22.2946	45.4139	0.22336	0.846643	6.97513	0.44439	0.0280338	1.54816
1	2012	Beijing	北京	2.82247	2.17388	19.0062	9.14132	21.4115	44.1212	0.25652	1.06896	7.00968	0.45435	0.0283917	1.44086
1	2013	Beijing	北京	2.59056	2.78968	19.3019	9.26222	22.2262	43.6491	0.285414	1.23873	7.03966	0.448068	0.0266615	1.34179
1	2014	Beijing	北京	2.39059	2.36647	19.6612	9.68551	22.8139	43.3588	0.314627	1.60802	7.05333	0.451834	0.0260356	1.1966
1	2015	Beijing	北京	2.16315	3.02012	19.9516	9.75855	22.721	45.2	0.347816	1.90545	7.07843	0.533223	0.0351718	0.864497
1	2016	Beijing	北京	1.98477	2.51844	20.6176	10.4046	23.4209	45.4555	0.364657	2.10509	7.10669	0.511701	0.0337	0.730623
1	2017	Beijing	北京	2.01675	3.12005	21.585	11.4759	24.1271	45.8039	0.390007	2.14649	7.1283	0.497367	0.0586	0.780186
1	2018	Beijing	北京	2.00327	2.70091	22.2971	12.3889	24.704	45.9339	0.428882	2.29953	7.1211	0.47567	0.0378	0.900264
1	2019	Beijing	北京	1.70813	2.85625	22.8194	13.02	25.2937	45.9946	0.470841	2.49189	7.14913	0.425874	0.0277	0.81222
1	2020	Beijing	北京	1.71334	2.1583	23.135	13.3459	25.5966	46.1481	0.515327	2.58951	7.05962	0.379928	0.0269	0.642864
2	2011	Tianjin	天津	1.93392	1.97266	17.8335	9.5865	22.0441	45.5136	0.0584625	-0.327523	6.63747	0.300258	0.0745768	0.590492
2	2012	Tianjin	天津	1.56254	1.64106	18.9928	9.13975	21.2969	44.2328	0.0734265	-0.301996	6.68853	0.304129	0.0735159	0.566115
2	2013	Tianjin	天津	1.4263	1.72583	19.2505	9.21529	22.1165	43.7271	0.0822243	-0.32112	6.74224	0.309541	0.0721681	0.551057
2	2014	Tianjin	天津	1.5583	2.00007	19.6138	9.63721	22.7538	43.4277	0.0937564	-0.251093	6.77675	0.301311	0.0736919	0.522947
2	2015	Tianjin	天津	1.4319	2.37239	19.9071	9.7039	22.613	45.2912	0.111082	-0.181119	6.79883	0.239639	0.0795938	0.430397
2	2016	Tianjin	天津	1.51404	2.1992	20.0772	9.97467	22.9697	44.7831	0.114222	-0.143759	6.80508	0.234163	0.0375	0.381245
2	2017	Tianjin	天津	1.46131	2.66837	21.5547	11.4078	24.093	45.9134	0.120098	-0.129822	6.79663	0.226986	0.0386	0.411111
2	2018	Tianjin	天津	1.31639	2.44428	22.2084	12.4274	24.8297	45.275	0.13149	-0.127603	6.79857	0.224949	0.0171	0.431168
2	2019	Tianjin	天津	1.71714	2.26298	22.7865	12.8029	25.1941	46.3288	0.152577	-0.0443763	6.79857	0.299072	0.0231	0.521611
2	2020	Tianjin	天津	2.26247	1.61976	22.8899	12.9343	25.2644	46.3194	0.163689	0.0220669	6.47235	0.2544	0.0232	0.520709
3	2011	Hebei	河北	1.36287	1.43763	20.8319	11.0784	23.641	45.1943	0.0458139	-0.682688	8.31557	0.327769	0.0123323	0.141214
3	2012	Hebei	河北	1.37127	1.41652	21.0803	11.1702	23.7359	45.1769	0.0629217	-0.54772	8.30968	0.348222	0.0137886	0.120105
3	2013	Hebei	河北	1.31986	1.79155	18.9596	8.74861	21.6718	43.2773	0.0788724	-0.435096	8.30202	0.369747	0.0140382	0.119565
3	2014	Hebei	河北	1.25224	2.24754	21.5185	11.5814	24.164	45.4775	0.0873627	-0.316069	8.28853	0.401769	0.0133039	0.125017
3	2015	Hebei	河北	1.26397	2.34875	21.7712	11.8314	24.3425	45.7646	0.103285	-0.255064	8.27563	0.314281	0.0129087	0.107645
3	2016	Hebei	河北	1.25768	2.55501	22.1214	12.1984	24.6571	45.8728	0.118554	-0.110907	8.26127	0.317781	0.0152	0.0966721
3	2017	Hebei	河北	1.15319	2.79152	22.4879	12.6071	24.9613	45.9788	0.132515	-0.0576311	8.24144	0.327446	0.0169	0.0988665
3	2018	Hebei	河北	1.07425	2.42777	22.7796	12.9584	25.2351	46.034	0.138701	-0.0181247	8.22657	0.332513	0.0167	0.0990505
3	2019	Hebei	河北	1.12719	2.18482	20.6966	10.6714	22.8277	44.5493	0.14442	0.0328668	8.21663	0.36991	0.0194	0.114063
3	2020	Hebei	河北	1.25413	1.58823	20.8297	11.0782	23.6388	45.1914	0.151182	0.0094315	8.20822	0.3509	0.0207	0.122819
4	2011	Liaoning	辽宁	1.62624	3.15392	17.0085	8.28861	20.4678	45	0.0653394	-0.595985	7.76848	0.364215	0.0705169	0.279068
4	2012	Liaoning	辽宁	1.4677	2.63193	17.9448	7.45047	19.8523	43.3036	0.0823089	-0.457482	7.7931	0.374468	0.0680708	0.264452
4	2013	Liaoning	辽宁	1.34531	2.576	17.5625	7.13178	19.1312	42.517	0.103	-0.313191	7.83157	0.388833	0.0660893	0.26053
4	2014	Liaoning	辽宁	1.35209	2.19379	18.0544	7.82945	20.0501	41.5816	0.11541	-0.206859	7.84863	0.414195	0.0588461	0.244622
4	2015	Liaoning	辽宁	1.33852	2.75915	18.8141	8.28046	21.9298	44.8342	0.132515	-0.151269	7.78734	0.291771	0.0112649	0.208447
4	2016	Liaoning	辽宁	1.93181	2.45216	19.8324	8.94701	22.7444	45.727	0.127905	-0.0976108	7.74117	0.38644	0.009	0.258435
4	2017	Liaoning	辽宁	1.79205	3.15286	20.606	9.06659	23.8095	46.3648	0.13376	-0.0560069	7.73397	0.371495	0.0154	0.286832
4	2018	Liaoning	辽宁	1.52448	2.94973	21.1521	10.0505	23.8722	46.6199	0.14125	-0.0543941	7.72339	0.359972	0.0128	0.299566
4	2019	Liaoning	辽宁	1.63832	2.8593	21.5257	10.396	24.1855	46.5561	0.149848	-0.0120461	7.71353	0.388229	0.0092	0.291677
4	2020	Liaoning	辽宁	1.77902	1.88333	21.6437	10.6257	24.1855	46.5561	0.155623	-0.0138848	7.71021	0.356795	0.0069	0.260442
5	2011	Shanghai	上海	2.34361	1.7438	20.8754	11.0909	23.6527	45.2238	0.139295	0.331042	7.00699	0.374344	0.0423988	1.47223
5	2012	Shanghai	上海	2.25852	1.68417	21.123	11.2085	23.7748	45.2364	0.172806	0.504693	7.01706	0.38849	0.0474961	1.36557
5	2013	Shanghai	上海	2.14019	1.59753	21.3293	11.3934	24.0011	45.3617	0.194265	0.588129	7.22177	0.392196	0.0476309	1.25256
5	2014	Shanghai	上海	2.09675	1.60141	21.5565	11.6108	24.1936	45.5674	0.246418	0.916955	7.21937	0.394756	0.0473487	1.21565
5	2015	Shanghai	上海	1.99356	1.67924	21.8145	11.8662	24.3696	45.8458	0.275086	1.11291	7.21635	0.461947	0.045762	1.11372
5	2016	Shanghai	上海	2.00169	1.79552	22.1587	12.2306	24.6647	45.9659	0.300243	1.29646	7.21909	0.446727	0.0436	1.02248
5	2017	Shanghai	上海	1.89487	2.01846	22.5321	12.6598	24.977	46.0822	0.32005	1.35003	7.2245	0.447214	0.0375	1.04942
5	2018	Shanghai	上海	1.64024	2.29129	22.805	12.9864	25.2054	46.1852	0.344304	1.3876	7.22669	0.455167	0.035	1.04421
5	2019	Shanghai	上海	1.47883	2.38029	23.0143	13.181	25.4052	46.3555	0.379655	1.54137	7.22708	0.415345	0.0344	0.892983
5	2020	Shanghai	上海	1.58737	1.74066	23.0864	13.2116	25.2791	46.7276	0.408083	1.65736	7.22548	0.411686	0.0361	0.897976
6	2011	Jiangsu	江苏	0.750662	1.95014	15.8778	6.89894	17.8679	45.2252	0.186162	0.456983	8.46574	0.326985	0.0422588	0.709637
6	2012	Jiangsu	江苏	0.709753	2.10071	17.6674	7.57095	18.3033	44.4196	0.214809	0.494896	8.47021	0.340579	0.0417572	0.639867
6	2013	Jiangsu	江苏	0.655986	1.94843	17.9054	7.56565	19.5152	44.246	0.244312	0.497168	8.47468	0.349406	0.0344719	0.570885
6	2014	Jiangsu	江苏	0.622035	2.03762	18.3028	7.58343	21.0989	43.8457	0.265441	0.535629	8.47904	0.360404	0.0265898	0.531861
6	2015	Jiangsu	江苏	0.587923	2.32466	18.4395	7.82244	20.4027	45.2877	0.293935	0.658611	8.48312	0.38094	0.0215631	0.484618
6	2016	Jiangsu	江苏	0.513752	2.47763	18.9287	7.90164	21.1374	45.3033	0.312532	0.76225	8.48678	0.382648	0.0211	0.437133
6	2017	Jiangsu	江苏	0.479403	2.31474	20.1235	9.67632	22.0517	45.8177	0.34072	0.866582	8.49142	0.382186	0.0198	0.464788
6	2018	Jiangsu	江苏	0.43181	2.68232	20.8966	11.2267	22.698	46.1466	0.358305	0.95604	8.49431	0.383092	0.0183	0.474471
6	2019	Jiangsu	江苏	0.44233	2.39676	21.2521	11.7021	22.6022	46.1936	0.377447	1.09106	8.49764	0.378118	0.0181	0.435878
6	2020	Jiangsu	江苏	0.445332	2.2272	21.6073	12.3925	22.4944	46.2662	0.402479	1.10464	8.49556	0.361044	0.0191	0.431662
7	2011	Zhejiang	浙江	1.02806	1.62821	16.3338	8.46289	19.8111	45.4117	0.139047	0.632092	8.12711	0.387786	0.0233141	0.61828
7	2012	Zhejiang	浙江	1.10017	1.82297	17.3079	8.51948	20.2557	44.2171	0.160385	0.532541	8.13359	0.40962	0.0237989	0.568878
7	2013	Zhejiang	浙江	0.899017	1.33387	18.5898	8.91771	21.5672	42.4053	0.181702	0.42194	8.14206	0.422994	0.0232249	0.550793
7	2014	Zhejiang	浙江	0.958733	1.29615	18.7062	9.10861	21.8311	42.0947	0.199047	0.501415	8.14873	0.443962	0.0241553	0.542886
7	2015	Zhejiang	浙江	0.88058	1.51335	18.5836	8.50803	21.149	43.9094	0.24122	0.665464	8.16195	0.440948	0.0246313	0.503634
7	2016	Zhejiang	浙江	0.851023	3.08615	18.7439	8.87434	21.4482	43.8053	0.255168	0.83208	8.17527	0.442668	0.0247	0.473137
7	2017	Zhejiang	浙江	0.754748	2.31896	18.6721	8.63581	21.3071	43.8935	0.276735	0.796756	8.19229	0.44663	0.0233	0.492865
7	2018	Zhejiang	浙江	0.79466	2.40125	19.5074	9.58355	22.0481	43.9347	0.2997	0.827206	8.21365	0.447743	0.0219	0.509118
7	2019	Zhejiang	浙江	0.641496	2.09539	20.5256	10.259	23.4929	44.2765	0.328311	0.92748	8.2351	0.438541	0.015	0.494802
7	2020	Zhejiang	浙江	0.694965	2.04728	20.8013	10.5058	23.871	44.3376	0.344547	0.928335	8.25765	0.412141	0.0169	0.521526
8	2011	Fujian	福建	1.7816	1.30835	21.4876	6.58915	33.3334	43.75	0.0685666	-0.167904	7.68754	0.357411	0.0228079	0.527889
8	2012	Fujian	福建	1.93932	1.40111	18.9838	9.09189	21.3914	44.099	0.0853088	-0.120501	7.69712	0.368317	0.0203063	0.499629
8	2013	Fujian	福建	1.78306	1.39191	19.2543	9.21931	22.1738	43.628	0.0997577	-0.105385	7.70075	0.378412	0.0189149	0.47952
8	2014	Fujian	福建	1.67401	1.36294	19.6282	9.66833	22.7876	43.3514	0.110941	-0.0646514	7.70481	0.388543	0.0181686	0.453023
8	2015	Fujian	福建	1.52719	1.75694	19.9089	9.70853	22.6372	45.2173	0.131664	0.0410886	7.72091	0.472405	0.0184202	0.404791
8	2016	Fujian	福建	1.29527	1.82749	20.5614	10.3629	23.3483	45.4557	0.141833	0.302737	7.7178	0.475624	0.0189	0.361564
8	2017	Fujian	福建	1.17937	2.79222	21.5354	11.4097	24.0933	45.8261	0.158656	0.58501	7.71244	0.478337	0.018	0.358823
8	2018	Fujian	福建	1.25089	2.55667	22.2469	12.3012	24.6856	45.9544	0.173882	0.511953	7.70616	0.47979	0.0082	0.346371
8	2019	Fujian	福建	0.950093	2.07903	22.6913	12.787	25.1399	46.1309	0.183342	0.499555	7.70075	0.445732	0.0075	0.31423
8	2020	Fujian	福建	1.01622	1.83432	22.9004	12.9159	25.2618	46.2668	0.181674	0.234839	7.69894	0.424256	0.0079	0.319838
9	2011	Shandong	山东	0.808728	2.21682	20.8347	11.0805	23.6406	45.1946	0.0857457	-0.712546	8.68525	0.378192	0.0158901	0.335864
9	2012	Shandong	山东	0.641494	2.19557	21.0829	11.1734	23.7375	45.1782	0.115835	-0.286507	8.68135	0.392934	0.0155911	0.309918
9	2013	Shandong	山东	0.640398	1.93782	21.2858	11.3532	23.9608	45.2807	0.145424	0.132303	8.67249	0.40367	0.0157584	0.298873
9	2014	Shandong	山东	0.576025	2.1492	21.5196	11.5836	24.1643	45.4763	0.162276	0.160062	8.66527	0.422563	0.0157069	0.286256
9	2015	Shandong	山东	0.575756	2.16613	21.7727	11.8336	24.3449	45.763	0.188931	0.186837	8.66095	0.342065	0.016115	0.237864
9	2016	Shandong	山东	0.616966	2.1487	22.1204	12.1989	24.6573	45.8713	0.221006	0.375439	8.65312	0.345201	0.0164	0.228838
9	2017	Shandong	山东	0.610366	2.55689	22.483	12.6023	24.9595	45.9761	0.245471	0.430939	8.64699	0.351459	0.0166	0.244528
9	2018	Shandong	山东	0.565306	3.28749	22.768	12.944	25.2302	46.0285	0.276103	0.636001	8.63426	0.359362	0.0178	0.25303
9	2019	Shandong	山东	0.56403	2.56039	22.9616	13.1421	25.4283	46.1101	0.270599	0.604635	8.62353	0.411597	0.0143	0.288293
9	2020	Shandong	山东	0.556934	2.20337	22.9116	12.9734	25.2645	46.2117	0.277325	0.625665	8.61432	0.399951	0.0166	0.302025
10	2011	Guangdong	广东	0.92446	2.21713	21.4813	11.24	23.1698	47.9807	0.219222	0.419247	8.71391	0.381458	0.026459	1.10879
10	2012	Guangdong	广东	0.82843	2.0961	20.7362	10.0942	22.807	47.3091	0.261163	0.700242	8.72762	0.39737	0.0260486	1.08846
10	2013	Guangdong	广东	0.764219	2.09362	21.4587	11.1564	23.9119	47.2106	0.302527	0.964577	8.74401	0.407427	0.0247353	1.0821
10	2014	Guangdong	广东	0.734654	1.99883	17.8294	10.5172	21.8333	40.4075	0.334622	1.15476	8.76842	0.419867	0.0243425	0.975263
10	2015	Guangdong	广东	0.71555	2.13148	18.6167	9.76426	22.0602	42.0853	0.371525	1.37136	8.78966	0.416505	0.0229893	0.874645
10	2016	Guangdong	广东	0.670267	2.24609	19.1616	10.2641	22.1008	42.1563	0.412712	1.5681	8.81031	0.411888	0.0192	0.784785
10	2017	Guangdong	广东	0.643358	2.76721	20.1323	10.6006	23.7155	42.9683	0.451781	1.5962	8.83317	0.407987	0.0172	0.75754
10	2018	Guangdong	广东	0.553841	2.92692	20.3109	10.5013	24.277	42.7769	0.513349	1.84874	8.84793	0.408799	0.0163	0.737716
10	2019	Guangdong	广东	0.535787	2.97055	20.7247	11.2378	23.5709	42.6833	0.566392	2.09355	8.85295	0.398917	0.0141	0.664168
10	2020	Guangdong	广东	0.544018	2.3703	23.1859	14.6972	27.0171	44.4472	0.597795	2.0668	8.85922	0.363015	0.0146	0.637705
11	2011	Hainan	海南	14.1663	1.62203	14.1322	11.6279	15.7895	42.8571	0.0249597	-0.530519	6.14249	0.326045	0.0389936	0.326594
11	2012	Hainan	海南	12.7864	1.67377	16.8595	8.52713	17.8947	42.8571	0.0423792	-0.357282	6.16521	0.332757	0.0362804	0.316606
11	2013	Hainan	海南	12.2921	1.27418	16.0468	7.36435	15.4971	42.2619	0.0538728	-0.269757	6.19555	0.343314	0.0352894	0.292073
11	2014	Hainan	海南	10.903	1.17991	17.9063	6.84755	19.883	43.1548	0.0669863	-0.0823466	6.22277	0.349785	0.0336132	0.278346
11	2015	Hainan	海南	10.7304	1.48124	20.9563	9.52383	25.3133	44.3878	0.0854823	-0.0426281	6.2359	0.380635	0.041475	0.234938
11	2016	Hainan	海南	9.52847	1.76509	21.1924	9.85606	25.5639	44.3878	0.0896455	0.0385036	6.24055	0.381748	0.0363	0.185976
11	2017	Hainan	海南	9.04409	1.82884	21.4876	10.8527	25.3133	43.6224	0.0930843	0.0484177	6.26505	0.387537	0.0349	0.156869
11	2018	Hainan	海南	9.32846	2.70328	21.2515	10.8527	22.807	43.6224	0.0987598	-0.0359995	6.2832	0.383419	0.0112	0.174383
11	2019	Hainan	海南	8.41277	2.26467	21.4286	11.6279	21.3033	44.1326	0.102717	-0.0595634	6.28434	0.367513	0.0198	0.170909
11	2020	Hainan	海南	7.87508	1.95131	20.8383	11.1849	19.7995	44.1326	0.104405	-0.149643	6.29336	0.356916	0.0378	0.169436
