# Supplementary material for: ESG performance and carbon emission intensity: examining the role of climate policy uncertainty and the digital economy in China’s dual-carbon era
Source: Frontiers journal article supplement (doi:10.3389/fenvs.2024.1526681), 2025-01-24
Supplement: Table_4.xlsx [file Table_4.xlsx]

## Sheet: Sheet1
icode	year	area	地区	CEI	CPU	ESG	E	S	G	DEshangzhi	DEzhuchengfen	CV劳动力水平	CV社会消费水平	CV外商直接投资	CV对外开放水平
1	2011	Neimenggu	内蒙古	0.434349	2.67935	15.978	7.08749	16.0401	43.6508	0.0236473	-0.676999	7.23562	0.277976	0.0172626	0.0536629
1	2012	Neimenggu	内蒙古	0.445727	2.177	18.2277	8.30564	18.7135	44.8413	0.0358586	-0.603288	7.22911	0.28793	0.0166021	0.0447542
1	2013	Neimenggu	内蒙古	0.611368	1.81269	17.2802	7.94572	18.1818	42.8572	0.0490967	-0.51824	7.22257	0.30232	0.0177289	0.0439126
1	2014	Neimenggu	内蒙古	0.448864	2.02672	17.1675	8.81782	18.9793	42.8572	0.0556163	-0.462988	7.21524	0.318376	0.0144211	0.0503183
1	2015	Neimenggu	内蒙古	0.563329	2.40972	18.3471	7.75192	20.5848	47.1429	0.0701544	-0.469606	7.2086	0.230126	0.0117582	0.0444689
1	2016	Neimenggu	内蒙古	0.635875	2.2887	19.2562	8.72093	21.2866	47.5	0.0776251	-0.380063	7.18992	0.243594	0.0109	0.0426511
1	2017	Neimenggu	内蒙古	0.776953	3.25677	20.7162	9.89864	23.6257	47.7381	0.0821715	-0.296334	7.18311	0.288428	0.0132	0.0582918
1	2018	Neimenggu	内蒙古	0.761353	2.71932	20.7713	10.2564	21.7544	47.5	0.0842518	-0.332198	7.17319	0.280655	0.0121	0.060054
1	2019	Neimenggu	内蒙古	0.510256	2.85134	21.4601	11.5086	21.7544	47.9762	0.0891738	-0.368297	7.14835	0.293455	0.0083	0.0638828
1	2020	Neimenggu	内蒙古	0.727657	2.27711	21.2121	10.8527	21.9883	47.9762	0.0949709	-0.323265	7.12448	0.274226	0.0072	0.0604738
2	2011	Guangxi	广西	2.8247	2.17051	16.5909	12.0155	26.6667	44.0476	0.0314703	-0.657549	7.9848	0.333439	0.00558766	0.128703
2	2012	Guangxi	广西	2.65278	2.10399	18.7686	9.94832	20.7895	44.246	0.0441353	-0.633008	7.92599	0.346495	0.0036249	0.142784
2	2013	Guangxi	广西	2.60393	1.94194	20.9971	8.9502	26.1404	45.2381	0.0546252	-0.640732	7.93102	0.355234	0.00300053	0.140698
2	2014	Guangxi	广西	2.51905	1.68841	22.1823	10.1952	26.1696	45.2381	0.0639185	-0.566459	7.93559	0.36833	0.00392404	0.158926
2	2015	Guangxi	广西	2.45496	1.91427	23.5598	11.2757	28.4795	46.2302	0.0757241	-0.765737	7.86134	0.343478	0.00638322	0.189377
2	2016	Guangxi	广西	2.27348	2.31594	23.3471	11.1034	27.8362	46.2302	0.0859759	-0.675786	7.85671	0.34665	0.0032	0.172705
2	2017	Guangxi	广西	2.3091	2.71208	23.304	10.5005	27.0663	48.2143	0.0921434	-0.569271	7.8501	0.379954	0.003	0.208533
2	2018	Guangxi	广西	2.01422	3.06058	23.2609	10.6727	26.4717	48.2143	0.104476	-0.468877	7.84854	0.376539	0.0016	0.202569
2	2019	Guangxi	广西	1.86616	2.21184	23.6741	11.2757	26.4717	48.6111	0.117051	-0.354507	7.84698	0.386159	0.001	0.221606
2	2020	Guangxi	广西	2.04218	1.94676	23.8119	11.5341	26.4717	48.6111	0.12735	-0.288516	7.84698	0.353437	0.0008	0.219193
3	2011	Chongqing	重庆	3.64022	1.89799	17.5188	9.52267	21.4944	45.1173	0.0359796	-0.696342	7.36963	0.3778	0.0375862	0.188432
3	2012	Chongqing	重庆	3.3224	1.59785	18.7195	8.9392	21.032	43.8052	0.0507986	-0.605987	7.38143	0.385903	0.019498	0.294355
3	2013	Chongqing	重庆	2.76427	1.36803	21.292	11.3595	23.9672	45.2982	0.0686702	-0.494959	7.38937	0.395502	0.0200745	0.332798
3	2014	Chongqing	重庆	2.39816	1.19336	19.32	9.41615	22.4445	43.0438	0.0838983	-0.36652	7.39764	0.400397	0.0182333	0.411017
3	2015	Chongqing	重庆	2.4963	1.70657	19.9518	9.73527	22.6999	45.3407	0.102949	-0.293484	7.40696	0.487846	0.0149469	0.295095
3	2016	Chongqing	重庆	2.07713	1.7681	20.5992	10.3691	23.3884	45.5764	0.118808	-0.135409	7.41356	0.492001	0.0104	0.234958
3	2017	Chongqing	重庆	2.19889	1.83296	21.5864	11.4681	24.1262	45.9148	0.131739	-0.0539635	7.41417	0.502937	0.0079	0.231507
3	2018	Chongqing	重庆	2.11916	2.35047	22.775	12.9559	25.2331	46.0567	0.145519	0.037368	7.41652	0.525713	0.0106	0.25678
3	2019	Chongqing	重庆	1.78861	2.47705	23.0118	13.1616	25.4627	46.2197	0.156419	0.0930084	7.41948	0.492748	0.0069	0.245332
3	2020	Chongqing	重庆	1.8286	2.44125	23.0073	13.0549	25.373	46.3605	0.167732	0.14596	7.42417	0.471435	0.0058	0.259817
4	2011	Sichuan	四川	1.14024	1.63543	20.8478	11.0899	23.6469	45.1978	0.0512637	-0.586001	8.44462	0.394299	0.0291229	0.146595
4	2012	Sichuan	四川	1.02946	2.17581	21.0906	11.18	23.7451	45.1878	0.0705145	-0.474164	8.44139	0.403053	0.025916	0.156389
4	2013	Sichuan	四川	0.957288	2.00594	21.2923	11.3591	23.9675	45.2948	0.0908255	-0.337911	8.44118	0.41683	0.0241336	0.151532
4	2014	Sichuan	四川	0.937194	1.72357	21.5269	11.5909	24.1728	45.4931	0.104846	-0.193352	8.44204	0.434283	0.0221452	0.151119
4	2015	Sichuan	四川	0.823609	1.7077	21.7777	11.8381	24.3485	45.779	0.128344	-0.0787354	8.44505	0.460332	0.0207165	0.106087
4	2016	Sichuan	四川	0.842107	1.97936	22.1224	12.201	24.6561	45.8892	0.14426	0.0919861	8.44613	0.471229	0.0161	0.0994418
4	2017	Sichuan	四川	0.731391	2.45263	22.4869	12.6077	24.9605	45.9957	0.164257	0.126917	8.44827	0.470641	0.0148	0.124375
4	2018	Sichuan	四川	0.67241	2.81297	22.768	12.9477	25.2255	46.0529	0.181632	0.206715	8.45319	0.475457	0.0146	0.146281
4	2019	Sichuan	四川	0.559703	2.66089	22.9968	13.1451	25.4475	46.2098	0.202025	0.383708	8.45829	0.457849	0.0137	0.145619
4	2020	Sichuan	四川	0.588163	2.32385	22.9015	12.9514	25.2722	46.2931	0.214809	0.344277	8.46485	0.428506	0.0143	0.165916
5	2011	Guizhou	贵州	5.67498	1.3737	16.2994	9.30233	28.0702	45.0397	0.0169863	-0.908611	7.47986	0.333208	0.0058337	0.0553644
5	2012	Guizhou	贵州	5.0922	1.91531	18.9256	8.30563	24.7368	43.2143	0.0300668	-0.796988	7.48437	0.33074	0.00452475	0.0610924
5	2013	Guizhou	贵州	4.41531	1.79242	19.5718	8.01032	25.0399	43.9935	0.0434655	-0.662182	7.49332	0.321658	0.0044168	0.0634885
5	2014	Guizhou	贵州	4.13736	1.77383	17.1676	8.26872	22.1691	41.0714	0.0535337	-0.546629	7.50659	0.316941	0.00308685	0.0714044
5	2015	Guizhou	贵州	3.99569	2.2839	18.2507	8.44959	22.076	44.7917	0.0699274	-0.519229	7.51861	0.468952	0.00248725	0.0724775
5	2016	Guizhou	贵州	3.41575	2.36758	18.2163	8.68215	21.6374	45.2381	0.0823437	-0.369585	7.52779	0.479922	0.0055	0.0321469
5	2017	Guizhou	贵州	3.15328	2.41885	20.7989	11.1628	22.5146	46.3729	0.0887649	-0.323551	7.53956	0.476294	0.0041	0.0406884
5	2018	Guizhou	贵州	2.83541	2.49972	19.8347	6.58915	27.193	42.8572	0.0974678	-0.272444	7.54221	0.479857	0.0027	0.0339792
5	2019	Guizhou	贵州	2.54336	2.28362	21.2121	10.4651	21.6374	44.5927	0.101545	-0.225002	7.54327	0.44535	0.0028	0.0270199
5	2020	Guizhou	贵州	2.28827	1.85188	20.8678	9.81912	21.6374	45.5357	0.104774	-0.232088	7.54539	0.439422	0.0017	0.030606
6	2011	Yunnan	云南	1.181	1.35898	17.5356	9.40497	21.5126	45.0455	0.0253186	-0.782492	7.95297	0.349248	0.0126226	0.116412
6	2012	Yunnan	云南	1.15156	1.60341	18.6945	8.88523	21.0739	43.6976	0.0386802	-0.699357	7.9498	0.34899	0.0134033	0.128667
6	2013	Yunnan	云南	1.08212	1.70406	18.9423	9.00694	21.8537	43.1983	0.0507918	-0.603962	7.9498	0.347574	0.0131639	0.132442
6	2014	Yunnan	云南	0.996552	1.70052	19.2901	9.3717	22.4301	42.9722	0.0607702	-0.489974	7.95823	0.361533	0.0129715	0.141926
6	2015	Yunnan	云南	0.530943	1.80888	19.6221	9.45011	22.3185	44.9029	0.0779767	-0.409555	7.94556	0.46925	0.0136832	0.112005
6	2016	Yunnan	云南	0.924074	1.93355	20.2513	10.0751	23.0316	45.1319	0.0849421	-0.33497	7.95683	0.488403	0.0039	0.0893925
6	2017	Yunnan	云南	0.516489	1.771	21.1029	10.9328	23.6574	45.5207	0.0892194	-0.316456	7.94839	0.500406	0.004	0.0969176
6	2018	Yunnan	云南	0.668146	2.35984	22.7603	12.9376	25.2231	46.0422	0.0971984	-0.31678	7.9452	0.514359	0.0039	0.110498
6	2019	Yunnan	云南	0.379189	2.23957	22.9586	13.1375	25.4283	46.145	0.103848	-0.272713	7.94165	0.437405	0.0021	0.100082
6	2020	Yunnan	云南	0.442706	2.25686	22.8699	12.9204	25.249	46.25	0.110955	-0.237043	7.93952	0.399353	0.0021	0.110066
7	2011	Shanxi	陕西	2.8051	1.95134	17.8638	9.60973	22.1748	45.4343	0.0354476	-0.625208	7.64348	0.311741	0.0121564	0.0756086
7	2012	Shanxi	陕西	2.32865	2.12947	18.9971	9.1139	21.4347	44.1069	0.0503648	-0.517701	7.6454	0.316985	0.0128231	0.0646333
7	2013	Shanxi	陕西	2.32063	1.87649	19.2813	9.23644	22.2219	43.6307	0.0662294	-0.386102	7.64492	0.323657	0.0140561	0.076923
7	2014	Shanxi	陕西	2.06691	1.99115	19.6996	9.70655	22.9108	43.4303	0.0782291	-0.25938	7.65017	0.33458	0.0144996	0.0950227
7	2015	Shanxi	陕西	2.09784	2.05863	19.9321	9.71971	22.6864	45.2158	0.095468	-0.209021	7.65302	0.380599	0.0159709	0.105404
7	2016	Shanxi	陕西	1.9047	2.35012	20.575	10.3623	23.3793	45.4561	0.108509	-0.0984109	7.65492	0.395921	0.0172	0.102537
7	2017	Shanxi	陕西	1.90045	2.64724	21.5554	11.4281	24.1201	45.8251	0.116765	-0.0451586	7.65492	0.393227	0.0182	0.123766
7	2018	Shanxi	陕西	1.73748	2.95294	22.7486	12.92	25.2188	46.0332	0.129309	0.0083396	7.65539	0.389156	0.0185	0.144339
7	2019	Shanxi	陕西	1.63571	2.53894	22.7229	12.8196	25.189	46.1279	0.143306	0.0557726	7.65634	0.395957	0.0207	0.13649
7	2020	Shanxi	陕西	1.6613	2.16652	22.9293	12.952	25.3146	46.2572	0.149226	0.0501602	7.65207	0.366891	0.0222	0.143843
8	2011	Gansu	甘肃	7.15788	2.15339	11.4325	1.5504	4.67837	41.0714	0.0169796	-0.85507	7.22911	0.353141	0.000900563	0.112295
8	2012	Gansu	甘肃	5.87873	2.1772	16.6261	5.76132	16.3127	43.1676	0.0304407	-0.732473	7.21377	0.365368	0.00068262	0.0994407
8	2013	Gansu	甘肃	5.96542	1.99681	17.9808	6.5219	19.709	43.2224	0.0417059	-0.636828	7.20934	0.374177	0.000697417	0.100138
8	2014	Gansu	甘肃	5.64444	2.19892	18.2704	7.36125	19.7967	42.4175	0.0506377	-0.530736	7.20638	0.390284	0.000901363	0.0776349
8	2015	Gansu	甘肃	5.35439	2.30615	18.7237	6.81329	19.7752	45.7453	0.0656929	-0.456382	7.20489	0.403089	0.00101227	0.0729397
8	2016	Gansu	甘肃	5.24873	2.14573	19.4663	8.12495	19.8768	45.7794	0.0686286	-0.360549	7.20117	0.414451	0.0011	0.0630339
8	2017	Gansu	甘肃	5.65522	2.45711	19.3758	7.62778	20.3362	45.9068	0.0724384	-0.374923	7.19818	0.429791	0.0004	0.0457868
8	2018	Gansu	甘肃	5.2912	2.95389	20.1362	8.70821	21.0682	45.9229	0.0782869	-0.34952	7.19818	0.416635	0.0004	0.048254
8	2019	Gansu	甘肃	5.33313	2.93113	20.2434	9.15652	20.467	45.9449	0.0830713	-0.382214	7.19519	0.424429	0.0006	0.0436786
8	2020	Gansu	甘肃	5.272	2.35832	20.5795	9.46333	21.1402	45.9619	0.0874244	-0.339907	7.19369	0.402852	0.0007	0.0423034
9	2011	Qinghai	青海	4.03451	1.63243	17.0799	7.36435	20	45.5357	0.0173677	-0.710168	5.73392	0.24748	0.00653443	0.0357197
9	2012	Qinghai	青海	4.71498	1.38956	16.3912	6.97676	16.9591	42.2619	0.0241238	-0.652403	5.73944	0.253652	0.00686009	0.0385866
9	2013	Qinghai	青海	3.73533	1.23076	16.6322	7.75195	17.5439	42.1875	0.0358761	-0.57194	5.75006	0.258994	0.00273529	0.0409388
9	2014	Qinghai	青海	3.47481	1.21693	16.4773	7.62273	16.886	42.4107	0.042263	-0.489302	5.75985	0.269524	0.00133613	0.045815
9	2015	Qinghai	青海	3.91552	1.56176	16.4371	7.36433	17.5439	43.254	0.0593539	-0.419977	5.77272	0.287375	0.00141727	0.0498486
9	2016	Qinghai	青海	3.20188	1.67778	17.3554	6.53377	19.2982	45.0397	0.0629068	-0.321155	5.78161	0.299282	0.0004	0.0394848
9	2017	Qinghai	青海	4.44875	2.11039	17.8145	6.20156	20.4678	45.4365	0.0660693	-0.308345	5.78987	0.321126	0.0005	0.0168568
9	2018	Qinghai	青海	2.83021	2.48408	18.4573	6.39536	22.4171	45.8333	0.0708044	-0.308364	5.79685	0.314076	0.0001	0.0167945
9	2019	Qinghai	青海	3.1716	2.46677	18.4573	6.49225	22.4171	45.0397	0.0730864	-0.378168	5.7997	0.319796	0.0016	0.0126719
9	2020	Qinghai	青海	4.89168	2.30469	18.4573	6.49225	22.4171	45.0397	0.0765871	-0.362553	5.63121	0.291857	0.0006	0.00757242
10	2011	Ningxia	宁夏	3.38872	1.39403	16.3223	11.2403	31.5789	41.5179	0.0208483	-0.57482	5.84932	0.245218	0.00620622	0.070227
10	2012	Ningxia	宁夏	3.94723	1.73532	19.3182	7.55813	25	40.625	0.0335441	-0.497798	5.84201	0.252211	0.00588303	0.059766
10	2013	Ningxia	宁夏	3.17508	1.42484	18.843	10.8527	18.5965	42.5	0.0426953	-0.472471	5.84354	0.259353	0.0035594	0.0773122
10	2014	Ningxia	宁夏	2.59685	1.28096	19.7521	12.5969	20.3509	41.4286	0.0521884	-0.366457	5.84064	0.267868	0.0020633	0.121316
10	2015	Ningxia	宁夏	4.75038	1.65736	18.9256	10.4651	19.6491	42.5	0.0656863	-0.368022	5.83773	0.357102	0.00398696	0.0799843
10	2016	Ningxia	宁夏	4.37646	1.70872	20.5785	12.0155	23.8596	42.5	0.0674573	-0.280516	5.83773	0.356815	0.0053	0.0681818
10	2017	Ningxia	宁夏	3.93686	2.27835	19.0909	7.1318	21.7544	43.9286	0.0726968	-0.271347	5.84064	0.364071	0.0061	0.0987501
10	2018	Ningxia	宁夏	2.58039	2.56137	19.5041	8.52714	21.7544	42.5	0.0778891	-0.236761	5.84354	0.358984	0.0038	0.0674489
10	2019	Ningxia	宁夏	2.13286	2.49688	19.0909	7.28684	22.807	42.5	0.0789298	-0.324973	5.83773	0.373325	0.0046	0.0642209
10	2020	Ningxia	宁夏	2.65677	1.88691	18.595	7.28684	20.7018	42.5	0.0820677	-0.311564	5.84064	0.331943	0.0048	0.0313163
11	2011	Xinjiang	新疆	1.31128	2.39396	20.8375	11.0834	23.6451	45.1961	0.0213205	-0.676275	7.11883	0.251496	0.00327335	0.222975
11	2012	Xinjiang	新疆	0.860404	2.15534	21.083	11.1759	23.7367	45.1783	0.0344615	-0.63761	7.12769	0.255299	0.00343115	0.211698
11	2013	Xinjiang	新疆	1.04036	1.82185	21.2866	11.3546	23.9617	45.2823	0.0454697	-0.629562	7.13887	0.258117	0.00352808	0.202151
11	2014	Xinjiang	新疆	1.33383	2.2604	21.5188	11.5835	24.1629	45.4764	0.0508946	-0.607922	7.14283	0.262739	0.00276224	0.183303
11	2015	Xinjiang	新疆	1.12228	2.3613	21.7711	11.8307	24.3424	45.7632	0.0637549	-0.627659	7.16395	0.297014	0.00302243	0.13138
11	2016	Xinjiang	新疆	0.862535	1.86416	22.1169	12.194	24.6535	45.87	0.0630847	-0.616587	7.18539	0.311429	0.0028	0.121408
11	2017	Xinjiang	新疆	0.82827	2.53075	22.4767	12.5945	24.9529	45.9738	0.068364	-0.632427	7.19744	0.29864	0.0012	0.128191
11	2018	Xinjiang	新疆	0.967516	2.45826	22.7597	12.9354	25.2192	46.0265	0.0771655	-0.552673	7.19369	0.281095	0.0011	0.108489
11	2019	Xinjiang	新疆	0.600039	2.48753	22.9374	13.1118	25.4036	46.0933	0.0811883	-0.576441	7.20266	0.266013	0.0017	0.120279
11	2020	Xinjiang	新疆	1.03786	2.35059	22.8895	12.9491	25.248	46.2057	0.0842795	-0.575649	7.21229	0.221959	0.0011	0.106832
