# Supplementary material for: ESG performance and carbon emission intensity: examining the role of climate policy uncertainty and the digital economy in China’s dual-carbon era
Source: Frontiers journal article supplement (doi:10.3389/fenvs.2024.1526681), 2025-01-24
Supplement: Table_5.xlsx [file Table_5.xlsx]

## Sheet: Sheet1
icode	year	area	地区	CEI	CPU	ESG	E	S	G	DEshangzhi	DEzhuchengfen	CV劳动力水平	CV社会消费水平	CV外商直接投资	CV对外开放水平
1	2011	Shanxi	山西	1.92772	2.00064	20.8591	11.0867	23.6467	45.2068	0.0287655	-0.798442	7.50494	0.347353	0.0119146	0.084736
1	2012	Shanxi	山西	2.07859	1.7624	21.1061	11.1977	23.7597	45.2117	0.041408	-0.706661	7.51425	0.372068	0.0130483	0.0783959
1	2013	Shanxi	山西	1.60502	1.76531	20.7789	10.788	23.1137	44.7846	0.053648	-0.605185	7.52564	0.40578	0.0137244	0.0772166
1	2014	Shanxi	山西	1.77493	1.7909	21.5321	11.5923	24.1767	45.5147	0.061826	-0.49397	7.51861	0.448059	0.0142089	0.0781374
1	2015	Shanxi	山西	2.18282	1.84579	21.7866	11.8446	24.3569	45.7974	0.0751646	-0.466831	7.53517	0.418682	0.0140012	0.0716259
1	2016	Shanxi	山西	1.88298	1.56578	22.1353	12.2111	24.6683	45.9126	0.0831383	-0.398353	7.51316	0.436707	0.0119	0.084802
1	2017	Shanxi	山西	1.55306	2.72113	22.5137	12.6293	24.9855	46.0242	0.0893092	-0.390236	7.50219	0.390156	0.0074	0.0746654
1	2018	Shanxi	山西	1.51791	3.02418	22.805	12.9873	25.2592	46.0909	0.0996779	-0.306024	7.48941	0.387874	0.0093	0.0816934
1	2019	Shanxi	山西	1.77561	2.61272	23.0355	13.1817	25.4863	46.2665	0.103889	-0.360599	7.4742	0.41291	0.0055	0.0850088
1	2020	Shanxi	山西	1.36189	2.39822	23.0215	13.0987	25.3545	46.4281	0.108888	-0.326836	7.46049	0.382185	0.0066	0.0853411
2	2011	Jilin	吉林	2.28786	3.18352	16.3682	6.45223	20.2632	42.5595	0.0253501	-0.755838	7.32974	0.389807	0.00905065	0.134818
2	2012	Jilin	吉林	1.76681	2.91119	16.96	6.96903	19.8325	42.8572	0.0392687	-0.670583	7.30652	0.399766	0.00871672	0.129869
2	2013	Jilin	吉林	1.92895	1.36475	17.4847	7.8156	20.9576	41.7583	0.0503089	-0.592065	7.28413	0.415931	0.00863722	0.122625
2	2014	Jilin	吉林	1.63606	1.04771	17.5639	8.00594	21.652	41.0714	0.058632	-0.492384	7.26334	0.440545	0.00874927	0.117402
2	2015	Jilin	吉林	1.88301	1.8076	18.1205	8.2032	21.25	43.544	0.0711496	-0.493584	7.24351	0.253976	0.00942024	0.0836058
2	2016	Jilin	吉林	1.91636	1.87685	18.4681	7.70726	21.5424	44.2308	0.0761636	-0.475958	7.2211	0.258033	0.0102	0.0829473
2	2017	Jilin	吉林	1.6385	2.30318	18.8022	8.48875	20.9576	44.6429	0.0836174	-0.403223	7.19968	0.267142	0.0098	0.0837491
2	2018	Jilin	吉林	1.83967	1.84641	18.9293	8.84111	20.9576	44.5055	0.0904817	-0.36144	7.18084	0.270243	0.0103	0.0907766
2	2019	Jilin	吉林	2.35061	1.99708	19.1415	8.39215	20.9138	44.7802	0.0909426	-0.368278	7.15929	0.359254	0.0149	0.111207
2	2020	Jilin	吉林	2.12617	1.86344	20.0316	9.29655	22.9605	44.7802	0.0958337	-0.303154	7.13966	0.310609	0.0151	0.103817
3	2011	Heilongjiang	黑龙江	2.86692	2.46577	16.7167	10.2067	15.7895	44.8052	0.0220927	-1.04354	7.63337	0.377531	0.017746	0.197751
3	2012	Heilongjiang	黑龙江	2.42321	2.58964	17.1488	8.13951	16.8129	44.4941	0.0357045	-0.835973	7.62021	0.401049	0.0184023	0.17331
3	2013	Heilongjiang	黑龙江	2.53454	2.05071	17.407	9.30231	16.9956	44.5313	0.0495553	-0.64716	7.5994	0.432462	0.01989	0.166577
3	2014	Heilongjiang	黑龙江	2.59442	2.43547	17.0713	9.14727	16.6667	43.6384	0.0583844	-0.493513	7.57353	0.466462	0.0210576	0.15889
3	2015	Heilongjiang	黑龙江	2.68794	2.62683	18.3763	8.72091	18.1631	46.7437	0.0696607	-0.482605	7.50934	0.296413	0.022897	0.0867636
3	2016	Heilongjiang	黑龙江	2.58498	2.68314	18.4492	8.34822	18.7823	47.1639	0.0761649	-0.46381	7.48212	0.311586	0.0255	0.071401
3	2017	Heilongjiang	黑龙江	2.66122	2.88342	19.227	8.01032	19.4015	47.0588	0.0817027	-0.428508	7.4378	0.319279	0.0249	0.0798636
3	2018	Heilongjiang	黑龙江	2.40473	3.51346	19.0569	7.95864	19.0919	47.0588	0.0849135	-0.424455	7.3994	0.322401	0.0241	0.106925
3	2019	Heilongjiang	黑龙江	3.31249	2.73194	19.3486	8.062	19.4015	47.479	0.0884167	-0.42907	7.34666	0.411667	0.0028	0.137379
3	2020	Heilongjiang	黑龙江	3.15947	2.11657	20.4424	9.01161	20.6398	47.7941	0.0933382	-0.346504	7.29506	0.371741	0.0027	0.111935
4	2011	Anhui	安徽	1.38056	1.37562	20.616	11.103	23.7408	42.2945	0.0437948	-0.514146	8.32383	0.345619	0.0279827	0.132164
4	2012	Anhui	安徽	1.29212	1.44885	20.5799	11.0251	24.0067	42.5639	0.0615076	-0.408992	8.34446	0.35689	0.0316802	0.144076
4	2013	Anhui	安徽	1.28366	1.70168	20.0216	10.1566	24.1416	42.5238	0.0766197	-0.356067	8.36075	0.366352	0.034422	0.146603
4	2014	Anhui	安徽	1.2443	1.46712	20.0663	10.4299	23.2741	43.273	0.0913629	-0.236615	8.36893	0.381654	0.0363575	0.144894
4	2015	Anhui	安徽	1.04051	1.75706	19.0579	10.0727	22.198	42.3753	0.114233	-0.137504	8.37611	0.508543	0.038548	0.135418
4	2016	Anhui	安徽	0.961667	1.97133	20.2666	11.0258	23.3582	44.6154	0.125518	-0.0385563	8.38059	0.518793	0.0402	0.120865
4	2017	Anhui	安徽	1.06626	2.12357	20.2809	9.68794	22.1981	46.9474	0.140211	0.0311513	8.38432	0.530343	0.0397	0.134037
4	2018	Anhui	安徽	1.00728	2.77441	21.8184	11.0309	24.1648	47.1809	0.157324	0.0822383	8.38601	0.538418	0.0375	0.138582
4	2019	Anhui	安徽	0.764785	2.48065	20.7009	10.1304	22.5748	47.7008	0.171312	0.20354	8.38572	0.481277	0.0333	0.127751
4	2020	Anhui	安徽	0.691612	2.69807	24.4746	14.5448	27.1182	48.8728	0.178929	0.220591	8.08425	0.473984	0.0327	0.140339
5	2011	Jiangxi	江西	2.09425	1.33363	17.4105	10	21.0526	44.1667	0.03451	-0.68262	7.77402	0.304243	0.0334397	0.173677
5	2012	Jiangxi	江西	1.75163	1.60467	18.1043	9.16136	18.9693	45.4241	0.050249	-0.576507	7.76811	0.318429	0.0332681	0.16289
5	2013	Jiangxi	江西	1.4867	1.10602	18.001	8.16933	19.0789	44.0848	0.0639337	-0.499776	7.76726	0.325887	0.0324525	0.157929
5	2014	Jiangxi	江西	1.53485	0.890638	18.4917	9.3023	19.0789	44.0848	0.0746642	-0.400007	7.76132	0.336794	0.0330337	0.167033
5	2015	Jiangxi	江西	1.45159	1.33378	18.595	7.85529	21.0526	46.1607	0.0951546	-0.306586	7.75705	0.383873	0.0352809	0.157908
5	2016	Jiangxi	江西	1.26688	1.34183	19.3182	8.96316	21.0526	46.3393	0.0981439	-0.374228	7.75448	0.389129	0.0375	0.143727
5	2017	Jiangxi	江西	1.24873	2.06773	20.1889	10.8042	21.8881	46.7687	0.115043	-0.27282	7.74803	0.405772	0.0387	0.15008
5	2018	Jiangxi	江西	1.04158	2.49877	20.1692	11.7647	22.1387	46.7687	0.125987	-0.186846	7.73849	0.411452	0.0378	0.145044
5	2019	Jiangxi	江西	0.999988	2.51097	22.4831	13.8673	24.4817	46.8344	0.137397	-0.102518	7.73105	0.406669	0.0378	0.141801
5	2020	Jiangxi	江西	1.08114	2.17193	22.7085	14.5133	24.0032	47.0779	0.148929	-0.0451217	7.72489	0.403706	0.0392	0.155798
6	2011	Henan	河南	0.863316	1.68131	17.1488	7.90698	20.9691	45.0893	0.042183	-0.715764	8.54267	0.35103	0.0241794	0.0782379
6	2012	Henan	河南	0.718503	1.86916	19.2562	7.82945	21.9298	42.9762	0.0611882	-0.57537	8.53895	0.368779	0.025843	0.110341
6	2013	Henan	河南	0.704669	1.84892	20.025	9.4205	23.3678	42.2751	0.0796731	-0.452059	8.53582	0.386024	0.0258888	0.115349
6	2014	Henan	河南	0.678283	1.67805	19.3641	8.52713	22.7583	41.4187	0.0928208	-0.350186	8.53346	0.40085	0.0262443	0.114233
6	2015	Henan	河南	0.682176	2.0167	20.4152	10.3001	23.2105	43.8839	0.11513	-0.289264	8.53208	0.41824	0.0270774	0.124191
6	2016	Henan	河南	0.620877	2.10114	21.8491	11.1019	25.0417	44.7321	0.130958	-0.228637	8.52754	0.426828	0.0279	0.116876
6	2017	Henan	河南	0.593291	2.57479	23.7105	13.9379	25.6491	45.1339	0.139935	-0.151679	8.52298	0.432949	0.0261	0.117619
6	2018	Henan	河南	0.501333	2.64146	24.4665	15.2843	25.2544	45	0.151076	-0.0259973	8.51559	0.442568	0.0247	0.114036
6	2019	Henan	河南	0.525854	2.5985	25.2256	15.5	26.0293	46.301	0.153746	0.0425589	8.50391	0.432666	0.0238	0.104889
6	2020	Henan	河南	0.579667	2.47695	25.081	15.4225	25.9416	45.9438	0.157999	0.011889	8.49372	0.409163	0.0252	0.121994
7	2011	Hubei	湖北	1.71483	1.37471	20.8367	11.0817	23.6448	45.1938	0.0451612	-0.568964	8.1277	0.425998	0.0153144	0.110497
7	2012	Hubei	湖北	1.54604	1.53265	21.0831	11.1722	23.7403	45.1796	0.0630767	-0.475486	8.13094	0.435155	0.0160743	0.0906818
7	2013	Hubei	湖北	1.53075	1.42432	21.2868	11.3523	23.9644	45.2832	0.0826717	-0.392567	8.13271	0.445143	0.017208	0.0908804
7	2014	Hubei	湖北	1.31682	1.26856	21.5219	11.5842	24.1686	45.4807	0.0941951	-0.272544	8.13388	0.454699	0.0177871	0.0965637
7	2015	Hubei	湖北	1.26568	1.45457	21.1821	11.2976	23.8795	45.2844	0.114453	-0.132455	8.13094	0.502464	0.01886	0.0960128
7	2016	Hubei	湖北	1.10583	1.67663	22.1225	12.1998	24.6583	45.8762	0.129202	-0.037438	8.12711	0.508241	0.0206	0.0800946
7	2017	Hubei	湖北	1.04373	1.63988	22.4901	12.6102	24.9637	45.9824	0.140921	0.0069268	8.12534	0.522004	0.0209	0.0881295
7	2018	Hubei	湖北	1.0539	2.50997	22.7795	12.9593	25.2399	46.0375	0.153058	0.064826	8.12474	0.523241	0.0201	0.0887242
7	2019	Hubei	湖北	0.946315	2.10072	22.9813	13.1646	25.4514	46.1247	0.167212	0.190234	8.12415	0.495814	0.0194	0.0860434
7	2020	Hubei	湖北	0.956277	3.41115	22.9528	13.0162	25.3048	46.249	0.173641	0.22273	8.08979	0.413984	0.0164	0.0988355
8	2011	Hunan	湖南	1.81181	1.32316	16.0194	4.77013	21.1563	43.192	0.0438665	-0.690248	8.29531	0.366505	0.0201945	0.0622047
8	2012	Hunan	湖南	1.54726	1.93394	15.9477	7.55468	17.4045	40.7563	0.0621768	-0.561054	8.29887	0.37549	0.0207442	0.0625395
8	2013	Hunan	湖南	1.40596	1.68205	16.6761	7.99863	18.8902	41.9255	0.0771976	-0.465962	8.30312	0.386225	0.0218956	0.0633246
8	2014	Hunan	湖南	1.30229	1.47918	16.4965	8.99531	18.3448	39.7515	0.0878984	-0.340396	8.30502	0.396618	0.0233237	0.0700485
8	2015	Hunan	湖南	1.34806	1.72275	16.6196	8.09333	18.0138	42.7296	0.10347	-0.27747	8.28911	0.388946	0.0249212	0.0631451
8	2016	Hunan	湖南	1.18413	1.9119	16.604	7.86533	18.4816	43.165	0.114218	-0.131293	8.27395	0.396179	0.0271	0.0552486
8	2017	Hunan	湖南	1.27972	2.20199	17.022	6.4647	18.3918	43.4524	0.124912	-0.118044	8.24728	0.406858	0.0288	0.0717826
8	2018	Hunan	湖南	1.15672	2.19243	17.4189	7.14033	18.8684	43.2143	0.141327	-0.0520211	8.22646	0.415483	0.0294	0.0844288
8	2019	Hunan	湖南	1.1771	2.7688	18.2178	8.39256	20.038	43.4524	0.149462	0.0290191	8.20699	0.419699	0.0314	0.109068
8	2020	Hunan	湖南	1.10824	2.10582	18.7137	8.97177	20.2134	43.4524	0.164062	0.0694971	8.0956	0.389122	0.0347	0.116684
