# Supplementary material for: ESG performance and carbon emission intensity: examining the role of climate policy uncertainty and the digital economy in China’s dual-carbon era
Source: Frontiers journal article supplement (doi:10.3389/fenvs.2024.1526681), 2025-01-24
Supplement: Table_6.xlsx [file Table_6.xlsx]

## Sheet: Sheet1
icode	year	area	地区	CEI	CPU	ESG	E	S	G	DEshangzhi	DEzhuchengfen	CV劳动力水平	CV社会消费水平	CV外商直接投资	CV对外开放水平	CO2	lnCO2	lnCO2guiyi	energy structure
1	2011	Beijing	北京	2.82915	2.34475	17.8988	9.65904	22.2946	45.4139	0.22336	0.846643	6.97513	0.44439	0.0280338	1.54816	45979.2	4.66256	0.876224	0.0175
1	2012	Beijing	北京	2.82247	2.17388	19.0062	9.14132	21.4115	44.1212	0.25652	1.06896	7.00968	0.45435	0.0283917	1.44086	50464	4.70298	0.915056	0.0176
1	2013	Beijing	北京	2.59056	2.78968	19.3019	9.26222	22.2262	43.6491	0.285414	1.23873	7.03966	0.448068	0.0266615	1.34179	51295.2	4.71008	0.921872	0.0171
1	2014	Beijing	北京	2.39059	2.36647	19.6612	9.68551	22.8139	43.3588	0.314627	1.60802	7.05333	0.451834	0.0260356	1.1966	50993.2	4.70751	0.919408	0.0168
1	2015	Beijing	北京	2.16315	3.02012	19.9516	9.75855	22.721	45.2	0.347816	1.90545	7.07843	0.533223	0.0351718	0.864497	49784	4.69709	0.909396	0.0167
1	2016	Beijing	北京	1.98477	2.51844	20.6176	10.4046	23.4209	45.4555	0.364657	2.10509	7.10669	0.511701	0.0337	0.730623	50947.2	4.70712	0.919032	0.0171
1	2017	Beijing	北京	2.01675	3.12005	21.585	11.4759	24.1271	45.8039	0.390007	2.14649	7.1283	0.497367	0.0586	0.780186	56499	4.75204	0.962187	0.0169
1	2018	Beijing	北京	2.00327	2.70091	22.2971	12.3889	24.704	45.9339	0.428882	2.29953	7.1211	0.47567	0.0378	0.900264	60739.2	4.78347	0.992381	0.0166
1	2019	Beijing	北京	1.70813	2.85625	22.8194	13.02	25.2937	45.9946	0.470841	2.49189	7.14913	0.425874	0.0277	0.81222	60418.8	4.78117	0.990174	0.0161
1	2020	Beijing	北京	1.71334	2.1583	23.135	13.3459	25.5966	46.1481	0.515327	2.58951	7.05962	0.379928	0.0269	0.642864	61856	4.79138	0.999983	0.0152
2	2011	Tianjin	天津	1.93392	1.97266	17.8335	9.5865	22.0441	45.5136	0.0584625	-0.327523	6.63747	0.300258	0.0745768	0.590492	21867.4	4.3398	0.566142	0.0148
2	2012	Tianjin	天津	1.56254	1.64106	18.9928	9.13975	21.2969	44.2328	0.0734265	-0.301996	6.68853	0.304129	0.0735159	0.566115	20147.2	4.30421	0.531958	0.0146
2	2013	Tianjin	天津	1.4263	1.72583	19.2505	9.21529	22.1165	43.7271	0.0822243	-0.32112	6.74224	0.309541	0.0721681	0.551057	20598.6	4.31384	0.541203	0.0145
2	2014	Tianjin	天津	1.5583	2.00007	19.6138	9.63721	22.7538	43.4277	0.0937564	-0.251093	6.77675	0.301311	0.0736919	0.522947	24507.2	4.38929	0.613694	0.0143
2	2015	Tianjin	天津	1.4319	2.37239	19.9071	9.7039	22.613	45.2912	0.111082	-0.181119	6.79883	0.239639	0.0795938	0.430397	23681	4.3744	0.599385	0.0141
2	2016	Tianjin	天津	1.51404	2.1992	20.0772	9.97467	22.9697	44.7831	0.114222	-0.143759	6.80508	0.234163	0.0375	0.381245	27079.2	4.43264	0.655333	0.0135
2	2017	Tianjin	天津	1.46131	2.66837	21.5547	11.4078	24.093	45.9134	0.120098	-0.129822	6.79663	0.226986	0.0386	0.411111	27106.2	4.43307	0.655749	0.0128
2	2018	Tianjin	天津	1.31639	2.44428	22.2084	12.4274	24.8297	45.275	0.13149	-0.127603	6.79857	0.224949	0.0171	0.431168	24760.8	4.39376	0.617989	0.0125
2	2019	Tianjin	天津	1.71714	2.26298	22.7865	12.8029	25.1941	46.3288	0.152577	-0.0443763	6.79857	0.299072	0.0231	0.521611	24219	4.38416	0.608758	0.0121
2	2020	Tianjin	天津	2.26247	1.61976	22.8899	12.9343	25.2644	46.3194	0.163689	0.0220669	6.47235	0.2544	0.0232	0.520709	31864	4.5033	0.723221	0.0116
3	2011	Hebei	河北	1.36287	1.43763	20.8319	11.0784	23.641	45.1943	0.0458139	-0.682688	8.31557	0.327769	0.0123323	0.141214	33411.8	4.5239	0.743011	0.0635
3	2012	Hebei	河北	1.37127	1.41652	21.0803	11.1702	23.7359	45.1769	0.0629217	-0.54772	8.30968	0.348222	0.0137886	0.120105	36441.6	4.5616	0.779227	0.0621
3	2013	Hebei	河北	1.31986	1.79155	18.9596	8.74861	21.6718	43.2773	0.0788724	-0.435096	8.30202	0.369747	0.0140382	0.119565	37540.8	4.5745	0.791626	0.0609
3	2014	Hebei	河北	1.25224	2.24754	21.5185	11.5814	24.164	45.4775	0.0873627	-0.316069	8.28853	0.401769	0.0133039	0.125017	36842.4	4.56635	0.783791	0.0596
3	2015	Hebei	河北	1.26397	2.34875	21.7712	11.8314	24.3425	45.7646	0.103285	-0.255064	8.27563	0.314281	0.0129087	0.107645	37674	4.57604	0.793104	0.0558
3	2016	Hebei	河北	1.25768	2.55501	22.1214	12.1984	24.6571	45.8728	0.118554	-0.110907	8.26127	0.317781	0.0152	0.0966721	40334.4	4.60568	0.821573	0.0546
3	2017	Hebei	河北	1.15319	2.79152	22.4879	12.6071	24.9613	45.9788	0.132515	-0.0576311	8.24144	0.327446	0.0169	0.0988665	39227.4	4.59359	0.809962	0.0546
3	2018	Hebei	河北	1.07425	2.42777	22.7796	12.9584	25.2351	46.034	0.138701	-0.0181247	8.22657	0.332513	0.0167	0.0990505	38684	4.58753	0.804142	0.0531
3	2019	Hebei	河北	1.12719	2.18482	20.6966	10.6714	22.8277	44.5493	0.14442	0.0328668	8.21663	0.36991	0.0194	0.114063	39569.4	4.59736	0.813584	0.0532
3	2020	Hebei	河北	1.25413	1.58823	20.8297	11.0782	23.6388	45.1914	0.151182	0.0094315	8.20822	0.3509	0.0207	0.122819	45408	4.65713	0.871008	0.0524
4	2011	Shanxi	山西	1.92772	2.00064	20.8591	11.0867	23.6467	45.2068	0.0287655	-0.798442	7.50494	0.347353	0.0119146	0.084736	21662.8	4.33571	0.56222	0.0351
4	2012	Shanxi	山西	2.07859	1.7624	21.1061	11.1977	23.7597	45.2117	0.041408	-0.706661	7.51425	0.372068	0.0130483	0.0783959	25177.6	4.40101	0.624954	0.0356
4	2013	Shanxi	山西	1.60502	1.76531	20.7789	10.788	23.1137	44.7846	0.053648	-0.605185	7.52564	0.40578	0.0137244	0.0772166	20328	4.30809	0.535685	0.0343
4	2014	Shanxi	山西	1.77493	1.7909	21.5321	11.5923	24.1767	45.5147	0.061826	-0.49397	7.51861	0.448059	0.0142089	0.0781374	22650.8	4.35508	0.580828	0.0328
4	2015	Shanxi	山西	2.18282	1.84579	21.7866	11.8446	24.3569	45.7974	0.0751646	-0.466831	7.53517	0.418682	0.0140012	0.0716259	27867	4.44509	0.667298	0.0305
4	2016	Shanxi	山西	1.88298	1.56578	22.1353	12.2111	24.6683	45.9126	0.0831383	-0.398353	7.51316	0.436707	0.0119	0.084802	24573.6	4.39047	0.614823	0.0301
4	2017	Shanxi	山西	1.55306	2.72113	22.5137	12.6293	24.9855	46.0242	0.0893092	-0.390236	7.50219	0.390156	0.0074	0.0746654	24116.6	4.38232	0.60699	0.0316
4	2018	Shanxi	山西	1.51791	3.02418	22.805	12.9873	25.2592	46.0909	0.0996779	-0.306024	7.48941	0.387874	0.0093	0.0816934	25528.4	4.40702	0.630727	0.0313
4	2019	Shanxi	山西	1.77561	2.61272	23.0355	13.1817	25.4863	46.2665	0.103889	-0.360599	7.4742	0.41291	0.0055	0.0850088	30232.8	4.48048	0.701295	0.0312
4	2020	Shanxi	山西	1.36189	2.39822	23.0215	13.0987	25.3545	46.4281	0.108888	-0.326836	7.46049	0.382185	0.0066	0.0853411	24040	4.38093	0.605663	0.0312
5	2011	Neimenggu	内蒙古	0.434349	2.67935	15.978	7.08749	16.0401	43.6508	0.0236473	-0.676999	7.23562	0.277976	0.0172626	0.0536629	6237.2	3.79499	0.0427415	0.0396
5	2012	Neimenggu	内蒙古	0.445727	2.177	18.2277	8.30564	18.7135	44.8413	0.0358586	-0.603288	7.22911	0.28793	0.0166021	0.0447542	7078.4	3.84994	0.095528	0.0407
5	2013	Neimenggu	内蒙古	0.611368	1.81269	17.2802	7.94572	18.1818	42.8572	0.0490967	-0.51824	7.22257	0.30232	0.0177289	0.0439126	10342.2	4.01461	0.253735	0.0408
5	2014	Neimenggu	内蒙古	0.448864	2.02672	17.1675	8.81782	18.9793	42.8572	0.0556163	-0.462988	7.21524	0.318376	0.0144211	0.0503183	7976.4	3.90181	0.145362	0.0434
5	2015	Neimenggu	内蒙古	0.563329	2.40972	18.3471	7.75192	20.5848	47.1429	0.0701544	-0.469606	7.2086	0.230126	0.0117582	0.0444689	10045	4.00195	0.24157	0.0447
5	2016	Neimenggu	内蒙古	0.635875	2.2887	19.2562	8.72093	21.2866	47.5	0.0776251	-0.380063	7.18992	0.243594	0.0109	0.0426511	11527.2	4.06172	0.298995	0.0436
5	2017	Neimenggu	内蒙古	0.776953	3.25677	20.7162	9.89864	23.6257	47.7381	0.0821715	-0.296334	7.18311	0.288428	0.0132	0.0582918	12506	4.09712	0.332999	0.0458
5	2018	Neimenggu	内蒙古	0.761353	2.71932	20.7713	10.2564	21.7544	47.5	0.0842518	-0.332198	7.17319	0.280655	0.0121	0.060054	13163.2	4.11936	0.354368	0.0486
5	2019	Neimenggu	内蒙古	0.510256	2.85134	21.4601	11.5086	21.7544	47.9762	0.0891738	-0.368297	7.14835	0.293455	0.0083	0.0638828	8782.8	3.94363	0.185544	0.0504
5	2020	Neimenggu	内蒙古	0.727657	2.27711	21.2121	10.8527	21.9883	47.9762	0.0949709	-0.323265	7.12448	0.274226	0.0072	0.0604738	12632	4.10147	0.337181	0.0519
6	2011	Liaoning	辽宁	1.62624	3.15392	17.0085	8.28861	20.4678	45	0.0653394	-0.595985	7.76848	0.364215	0.0705169	0.279068	36146	4.55806	0.775829	0.0396
6	2012	Liaoning	辽宁	1.4677	2.63193	17.9448	7.45047	19.8523	43.3036	0.0823089	-0.457482	7.7931	0.374468	0.0680708	0.264452	36467.2	4.5619	0.77952	0.0383
6	2013	Liaoning	辽宁	1.34531	2.576	17.5625	7.13178	19.1312	42.517	0.103	-0.313191	7.83157	0.388833	0.0660893	0.26053	36610.2	4.5636	0.781153	0.0376
6	2014	Liaoning	辽宁	1.35209	2.19379	18.0544	7.82945	20.0501	41.5816	0.11541	-0.206859	7.84863	0.414195	0.0588461	0.244622	38705.6	4.58777	0.804375	0.0366
6	2015	Liaoning	辽宁	1.33852	2.75915	18.8141	8.28046	21.9298	44.8342	0.132515	-0.151269	7.78734	0.291771	0.0112649	0.208447	38374	4.58404	0.800785	0.0349
6	2016	Liaoning	辽宁	1.93181	2.45216	19.8324	8.94701	22.7444	45.727	0.127905	-0.0976108	7.74117	0.38644	0.009	0.258435	42976.8	4.63323	0.848049	0.0341
6	2017	Liaoning	辽宁	1.79205	3.15286	20.606	9.06659	23.8095	46.3648	0.13376	-0.0560069	7.73397	0.371495	0.0154	0.286832	41950.6	4.62274	0.837965	0.0339
6	2018	Liaoning	辽宁	1.52448	2.94973	21.1521	10.0505	23.8722	46.6199	0.14125	-0.0543941	7.72339	0.359972	0.0128	0.299566	38592.8	4.58651	0.803157	0.0334
6	2019	Liaoning	辽宁	1.63832	2.8593	21.5257	10.396	24.1855	46.5561	0.149848	-0.0120461	7.71353	0.388229	0.0092	0.291677	40809.6	4.61076	0.82646	0.0331
6	2020	Liaoning	辽宁	1.77902	1.88333	21.6437	10.6257	24.1855	46.5561	0.155623	-0.0138848	7.71021	0.356795	0.0069	0.260442	44680	4.65011	0.864265	0.0323
7	2011	Jilin	吉林	2.28786	3.18352	16.3682	6.45223	20.2632	42.5595	0.0253501	-0.755838	7.32974	0.389807	0.00905065	0.134818	24180	4.38346	0.608086	0.0134
7	2012	Jilin	吉林	1.76681	2.91119	16.96	6.96903	19.8325	42.8572	0.0392687	-0.670583	7.30652	0.399766	0.00871672	0.129869	21094.4	4.32417	0.551126	0.0128
7	2013	Jilin	吉林	1.92895	1.36475	17.4847	7.8156	20.9576	41.7583	0.0503089	-0.592065	7.28413	0.415931	0.00863722	0.122625	25165.8	4.40081	0.624758	0.0122
7	2014	Jilin	吉林	1.63606	1.04771	17.5639	8.00594	21.652	41.0714	0.058632	-0.492384	7.26334	0.440545	0.00874927	0.117402	22582.8	4.35378	0.579573	0.012
7	2015	Jilin	吉林	1.88301	1.8076	18.1205	8.2032	21.25	43.544	0.0711496	-0.493584	7.24351	0.253976	0.00942024	0.0836058	26481	4.42293	0.646012	0.0115
7	2016	Jilin	吉林	1.91636	1.87685	18.4681	7.70726	21.5424	44.2308	0.0761636	-0.475958	7.2211	0.258033	0.0102	0.0829473	28317.6	4.45206	0.67399	0.0112
7	2017	Jilin	吉林	1.6385	2.30318	18.8022	8.48875	20.9576	44.6429	0.0836174	-0.403223	7.19968	0.267142	0.0098	0.0837491	24486.6	4.38893	0.613343	0.0111
7	2018	Jilin	吉林	1.83967	1.84641	18.9293	8.84111	20.9576	44.5055	0.0904817	-0.36144	7.18084	0.270243	0.0103	0.0907766	27732.4	4.44299	0.665278	0.0109
7	2019	Jilin	吉林	2.35061	1.99708	19.1415	8.39215	20.9138	44.7802	0.0909426	-0.368278	7.15929	0.359254	0.0149	0.111207	27565.2	4.44036	0.662754	0.0108
7	2020	Jilin	吉林	2.12617	1.86344	20.0316	9.29655	22.9605	44.7802	0.0958337	-0.303154	7.13966	0.310609	0.0151	0.103817	26176	4.4179	0.641179	0.0107
8	2011	Heilongjiang	黑龙江	2.86692	2.46577	16.7167	10.2067	15.7895	44.8052	0.0220927	-1.04354	7.63337	0.377531	0.017746	0.197751	36071.6	4.55717	0.774969	0.0171
8	2012	Heilongjiang	黑龙江	2.42321	2.58964	17.1488	8.13951	16.8129	44.4941	0.0357045	-0.835973	7.62021	0.401049	0.0184023	0.17331	33177.6	4.52084	0.740076	0.0167
8	2013	Heilongjiang	黑龙江	2.53454	2.05071	17.407	9.30231	16.9956	44.5313	0.0495553	-0.64716	7.5994	0.432462	0.01989	0.166577	36636.6	4.56392	0.781454	0.0158
8	2014	Heilongjiang	黑龙江	2.59442	2.43547	17.0713	9.14727	16.6667	43.6384	0.0583844	-0.493513	7.57353	0.466462	0.0210576	0.15889	39018.4	4.59127	0.807733	0.0154
8	2015	Heilongjiang	黑龙江	2.68794	2.62683	18.3763	8.72091	18.1631	46.7437	0.0696607	-0.482605	7.50934	0.296413	0.022897	0.0867636	40544	4.60793	0.823736	0.0153
8	2016	Heilongjiang	黑龙江	2.58498	2.68314	18.4492	8.34822	18.7823	47.1639	0.0761649	-0.46381	7.48212	0.311586	0.0255	0.071401	39772.8	4.59959	0.815723	0.015
8	2017	Heilongjiang	黑龙江	2.66122	2.88342	19.227	8.01032	19.4015	47.0588	0.0817027	-0.428508	7.4378	0.319279	0.0249	0.0798636	42320.6	4.62655	0.841629	0.0147
8	2018	Heilongjiang	黑龙江	2.40473	3.51346	19.0569	7.95864	19.0919	47.0588	0.0849135	-0.424455	7.3994	0.322401	0.0241	0.106925	39345.2	4.59489	0.811213	0.0141
8	2019	Heilongjiang	黑龙江	3.31249	2.73194	19.3486	8.062	19.4015	47.479	0.0884167	-0.42907	7.34666	0.411667	0.0028	0.137379	45091.8	4.6541	0.868093	0.0137
8	2020	Heilongjiang	黑龙江	3.15947	2.11657	20.4424	9.01161	20.6398	47.7941	0.0933382	-0.346504	7.29506	0.371741	0.0027	0.111935	43280	4.63629	0.850982	0.0135
9	2011	Shanghai	上海	2.34361	1.7438	20.8754	11.0909	23.6527	45.2238	0.139295	0.331042	7.00699	0.374344	0.0423988	1.47223	44987.2	4.65309	0.867124	0.0285
9	2012	Shanghai	上海	2.25852	1.68417	21.123	11.2085	23.7748	45.2364	0.172806	0.504693	7.01706	0.38849	0.0474961	1.36557	45580.8	4.65878	0.872593	0.0273
9	2013	Shanghai	上海	2.14019	1.59753	21.3293	11.3934	24.0011	45.3617	0.194265	0.588129	7.22177	0.392196	0.0476309	1.25256	46695	4.66927	0.882669	0.0264
9	2014	Shanghai	上海	2.09675	1.60141	21.5565	11.6108	24.1936	45.5674	0.246418	0.916955	7.21937	0.394756	0.0473487	1.21565	49415.6	4.69386	0.906297	0.0246
9	2015	Shanghai	上海	1.99356	1.67924	21.8145	11.8662	24.3696	45.8458	0.275086	1.11291	7.21635	0.461947	0.045762	1.11372	50085	4.69971	0.911911	0.0247
9	2016	Shanghai	上海	2.00169	1.79552	22.1587	12.2306	24.6647	45.9659	0.300243	1.29646	7.21909	0.446727	0.0436	1.02248	56404.8	4.75132	0.961491	0.0249
9	2017	Shanghai	上海	1.89487	2.01846	22.5321	12.6598	24.977	46.0822	0.32005	1.35003	7.2245	0.447214	0.0375	1.04942	58045.6	4.76377	0.973455	0.0242
9	2018	Shanghai	上海	1.64024	2.29129	22.805	12.9864	25.2054	46.1852	0.344304	1.3876	7.22669	0.455167	0.035	1.04421	53602.8	4.72919	0.940232	0.0227
9	2019	Shanghai	上海	1.47883	2.38029	23.0143	13.181	25.4052	46.3555	0.379655	1.54137	7.22708	0.415345	0.0344	0.892983	56425.2	4.75147	0.961642	0.0216
9	2020	Shanghai	上海	1.58737	1.74066	23.0864	13.2116	25.2791	46.7276	0.408083	1.65736	7.22548	0.411686	0.0361	0.897976	61432	4.78839	0.997113	0.021
10	2011	Jiangsu	江苏	0.750662	1.95014	15.8778	6.89894	17.8679	45.2252	0.186162	0.456983	8.46574	0.326985	0.0422588	0.709637	36865.2	4.56662	0.784049	0.091
10	2012	Jiangsu	江苏	0.709753	2.10071	17.6674	7.57095	18.3033	44.4196	0.214809	0.494896	8.47021	0.340579	0.0417572	0.639867	38368	4.58397	0.80072	0.0924
10	2013	Jiangsu	江苏	0.655986	1.94843	17.9054	7.56565	19.5152	44.246	0.244312	0.497168	8.47468	0.349406	0.0344719	0.570885	39197.4	4.59326	0.809643	0.0928
10	2014	Jiangsu	江苏	0.622035	2.03762	18.3028	7.58343	21.0989	43.8457	0.265441	0.535629	8.47904	0.360404	0.0265898	0.531861	40487.2	4.60732	0.823151	0.0901
10	2015	Jiangsu	江苏	0.587923	2.32466	18.4395	7.82244	20.4027	45.2877	0.293935	0.658611	8.48312	0.38094	0.0215631	0.484618	41223	4.61514	0.830665	0.0898
10	2016	Jiangsu	江苏	0.513752	2.47763	18.9287	7.90164	21.1374	45.3033	0.312532	0.76225	8.48678	0.382648	0.0211	0.437133	39758.4	4.59943	0.815572	0.0914
10	2017	Jiangsu	江苏	0.479403	2.31474	20.1235	9.67632	22.0517	45.8177	0.34072	0.866582	8.49142	0.382186	0.0198	0.464788	41166.2	4.61454	0.83009	0.0921
10	2018	Jiangsu	江苏	0.43181	2.68232	20.8966	11.2267	22.698	46.1466	0.358305	0.95604	8.49431	0.383092	0.0183	0.474471	39983.6	4.60188	0.817929	0.0888
10	2019	Jiangsu	江苏	0.44233	2.39676	21.2521	11.7021	22.6022	46.1936	0.377447	1.09106	8.49764	0.378118	0.0181	0.435878	44070	4.64414	0.858529	0.0864
10	2020	Jiangsu	江苏	0.445332	2.2272	21.6073	12.3925	22.4944	46.2662	0.402479	1.10464	8.49556	0.361044	0.0191	0.431662	45744	4.66033	0.874084	0.0849
11	2011	Zhejiang	浙江	1.02806	1.62821	16.3338	8.46289	19.8111	45.4117	0.139047	0.632092	8.12711	0.387786	0.0233141	0.61828	33225.8	4.52148	0.740682	0.0663
11	2012	Zhejiang	浙江	1.10017	1.82297	17.3079	8.51948	20.2557	44.2171	0.160385	0.532541	8.13359	0.40962	0.0237989	0.568878	38137.6	4.58135	0.798207	0.0647
11	2013	Zhejiang	浙江	0.899017	1.33387	18.5898	8.91771	21.5672	42.4053	0.181702	0.42194	8.14206	0.422994	0.0232249	0.550793	33943.8	4.53076	0.749602	0.0646
11	2014	Zhejiang	浙江	0.958733	1.29615	18.7062	9.10861	21.8311	42.0947	0.199047	0.501415	8.14873	0.443962	0.0241553	0.542886	38515.2	4.58563	0.802317	0.063
11	2015	Zhejiang	浙江	0.88058	1.51335	18.5836	8.50803	21.149	43.9094	0.24122	0.665464	8.16195	0.440948	0.0246313	0.503634	37765	4.57709	0.79411	0.0624
11	2016	Zhejiang	浙江	0.851023	3.08615	18.7439	8.87434	21.4482	43.8053	0.255168	0.83208	8.17527	0.442668	0.0247	0.473137	40212	4.60436	0.820305	0.0648
11	2017	Zhejiang	浙江	0.754748	2.31896	18.6721	8.63581	21.3071	43.8935	0.276735	0.796756	8.19229	0.44663	0.0233	0.492865	39072	4.59187	0.808306	0.0665
11	2018	Zhejiang	浙江	0.79466	2.40125	19.5074	9.58355	22.0481	43.9347	0.2997	0.827206	8.21365	0.447743	0.0219	0.509118	44657.6	4.6499	0.864056	0.0657
11	2019	Zhejiang	浙江	0.641496	2.09539	20.5256	10.259	23.4929	44.2765	0.328311	0.92748	8.2351	0.438541	0.015	0.494802	39998.4	4.60204	0.818083	0.0649
11	2020	Zhejiang	浙江	0.694965	2.04728	20.8013	10.5058	23.871	44.3376	0.344547	0.928335	8.25765	0.412141	0.0169	0.521526	44904	4.65229	0.866351	0.0643
12	2011	Anhui	安徽	1.38056	1.37562	20.616	11.103	23.7408	42.2945	0.0437948	-0.514146	8.32383	0.345619	0.0279827	0.132164	21123.4	4.32476	0.551699	0.026
12	2012	Anhui	安徽	1.29212	1.44885	20.5799	11.0251	24.0067	42.5639	0.0615076	-0.408992	8.34446	0.35689	0.0316802	0.144076	22240	4.34713	0.573191	0.0274
12	2013	Anhui	安徽	1.28366	1.70168	20.0216	10.1566	24.1416	42.5238	0.0766197	-0.356067	8.36075	0.366352	0.034422	0.146603	24684	4.39242	0.616693	0.0286
12	2014	Anhui	安徽	1.2443	1.46712	20.0663	10.4299	23.2741	43.273	0.0913629	-0.236615	8.36893	0.381654	0.0363575	0.144894	25942	4.414	0.637432	0.0285
12	2015	Anhui	安徽	1.04051	1.75706	19.0579	10.0727	22.198	42.3753	0.114233	-0.137504	8.37611	0.508543	0.038548	0.135418	22897	4.35978	0.585338	0.0288
12	2016	Anhui	安徽	0.961667	1.97133	20.2666	11.0258	23.3582	44.6154	0.125518	-0.0385563	8.38059	0.518793	0.0402	0.120865	23472	4.37055	0.595687	0.03
12	2017	Anhui	安徽	1.06626	2.12357	20.2809	9.68794	22.1981	46.9474	0.140211	0.0311513	8.38432	0.530343	0.0397	0.134037	28808.2	4.45952	0.681157	0.0305
12	2018	Anhui	安徽	1.00728	2.77441	21.8184	11.0309	24.1648	47.1809	0.157324	0.0822383	8.38601	0.538418	0.0375	0.138582	30225.2	4.48037	0.70119	0.0309
12	2019	Anhui	安徽	0.764785	2.48065	20.7009	10.1304	22.5748	47.7008	0.171312	0.20354	8.38572	0.481277	0.0333	0.127751	28384.2	4.45308	0.67497	0.0317
12	2020	Anhui	安徽	0.691612	2.69807	24.4746	14.5448	27.1182	48.8728	0.178929	0.220591	8.08425	0.473984	0.0327	0.140339	26752	4.42736	0.650261	0.0323
13	2011	Fujian	福建	1.7816	1.30835	21.4876	6.58915	33.3334	43.75	0.0685666	-0.167904	7.68754	0.357411	0.0228079	0.527889	31285.2	4.49534	0.715572	0.0322
13	2012	Fujian	福建	1.93932	1.40111	18.9838	9.09189	21.3914	44.099	0.0853088	-0.120501	7.69712	0.368317	0.0203063	0.499629	38208	4.58215	0.798976	0.0319
13	2013	Fujian	福建	1.78306	1.39191	19.2543	9.21931	22.1738	43.628	0.0997577	-0.105385	7.70075	0.378412	0.0189149	0.47952	38992.8	4.59098	0.807459	0.0318
13	2014	Fujian	福建	1.67401	1.36294	19.6282	9.66833	22.7876	43.3514	0.110941	-0.0646514	7.70481	0.388543	0.0181686	0.453023	40269.6	4.60498	0.820902	0.0334
13	2015	Fujian	福建	1.52719	1.75694	19.9089	9.70853	22.6372	45.2173	0.131664	0.0410886	7.72091	0.472405	0.0184202	0.404791	39676	4.59853	0.814706	0.0325
13	2016	Fujian	福建	1.29527	1.82749	20.5614	10.3629	23.3483	45.4557	0.141833	0.302737	7.7178	0.475624	0.0189	0.361564	37317.6	4.57191	0.789138	0.0329
13	2017	Fujian	福建	1.17937	2.79222	21.5354	11.4097	24.0933	45.8261	0.158656	0.58501	7.71244	0.478337	0.018	0.358823	37954.6	4.57926	0.7962	0.0335
13	2018	Fujian	福建	1.25089	2.55667	22.2469	12.3012	24.6856	45.9544	0.173882	0.511953	7.70616	0.47979	0.0082	0.346371	44786.8	4.65115	0.865261	0.0335
13	2019	Fujian	福建	0.950093	2.07903	22.6913	12.787	25.1399	46.1309	0.183342	0.499555	7.70075	0.445732	0.0075	0.31423	40279.2	4.60508	0.821002	0.0331
13	2020	Fujian	福建	1.01622	1.83432	22.9004	12.9159	25.2618	46.2668	0.181674	0.234839	7.69894	0.424256	0.0079	0.319838	44616	4.64949	0.863667	0.0331
14	2011	Jiangxi	江西	2.09425	1.33363	17.4105	10	21.0526	44.1667	0.03451	-0.68262	7.77402	0.304243	0.0334397	0.173677	24508.6	4.38932	0.613717	0.0178
14	2012	Jiangxi	江西	1.75163	1.60467	18.1043	9.16136	18.9693	45.4241	0.050249	-0.576507	7.76811	0.318429	0.0332681	0.16289	22681.6	4.35567	0.581395	0.0175
14	2013	Jiangxi	江西	1.4867	1.10602	18.001	8.16933	19.0789	44.0848	0.0639337	-0.499776	7.76726	0.325887	0.0324525	0.157929	21423.6	4.33089	0.557587	0.0177
14	2014	Jiangxi	江西	1.53485	0.890638	18.4917	9.3023	19.0789	44.0848	0.0746642	-0.400007	7.76132	0.336794	0.0330337	0.167033	24119.6	4.38237	0.607042	0.0183
14	2015	Jiangxi	江西	1.45159	1.33378	18.595	7.85529	21.0526	46.1607	0.0951546	-0.306586	7.75705	0.383873	0.0352809	0.157908	24276	4.38518	0.609739	0.0191
14	2016	Jiangxi	江西	1.26688	1.34183	19.3182	8.96316	21.0526	46.3393	0.0981439	-0.374228	7.75448	0.389129	0.0375	0.143727	23436	4.36988	0.595046	0.0198
14	2017	Jiangxi	江西	1.24873	2.06773	20.1889	10.8042	21.8881	46.7687	0.115043	-0.27282	7.74803	0.405772	0.0387	0.15008	24982.4	4.39763	0.621706	0.0205
14	2018	Jiangxi	江西	1.04158	2.49877	20.1692	11.7647	22.1387	46.7687	0.125987	-0.186846	7.73849	0.411452	0.0378	0.145044	22898.8	4.35981	0.585371	0.0207
14	2019	Jiangxi	江西	0.999988	2.51097	22.4831	13.8673	24.4817	46.8344	0.137397	-0.102518	7.73105	0.406669	0.0378	0.141801	24757.2	4.3937	0.617928	0.0212
14	2020	Jiangxi	江西	1.08114	2.17193	22.7085	14.5133	24.0032	47.0779	0.148929	-0.0451217	7.72489	0.403706	0.0392	0.155798	27776	4.44367	0.665933	0.0217
15	2011	Shandong	山东	0.808728	2.21682	20.8347	11.0805	23.6406	45.1946	0.0857457	-0.712546	8.68525	0.378192	0.0158901	0.335864	36685.4	4.56449	0.782009	0.0773
15	2012	Shandong	山东	0.641494	2.19557	21.0829	11.1734	23.7375	45.1782	0.115835	-0.286507	8.68135	0.392934	0.0155911	0.309918	32083.2	4.50628	0.726081	0.0765
15	2013	Shandong	山东	0.640398	1.93782	21.2858	11.3532	23.9608	45.2807	0.145424	0.132303	8.67249	0.40367	0.0157584	0.298873	35369.4	4.54863	0.766767	0.0764
15	2014	Shandong	山东	0.576025	2.1492	21.5196	11.5836	24.1643	45.4763	0.162276	0.160062	8.66527	0.422563	0.0157069	0.286256	34231.2	4.53442	0.75312	0.0759
15	2015	Shandong	山东	0.575756	2.16613	21.7727	11.8336	24.3449	45.763	0.188931	0.186837	8.66095	0.342065	0.016115	0.237864	36274	4.5596	0.777304	0.0899
15	2016	Shandong	山东	0.616966	2.1487	22.1204	12.1989	24.6573	45.8713	0.221006	0.375439	8.65312	0.345201	0.0164	0.228838	41968.8	4.62293	0.838146	0.0902
15	2017	Shandong	山东	0.610366	2.55689	22.483	12.6023	24.9595	45.9761	0.245471	0.430939	8.64699	0.351459	0.0166	0.244528	44333.4	4.64673	0.861016	0.0861
15	2018	Shandong	山东	0.565306	3.28749	22.768	12.944	25.2302	46.0285	0.276103	0.636001	8.63426	0.359362	0.0178	0.25303	43228.8	4.63577	0.850488	0.0857
15	2019	Shandong	山东	0.56403	2.56039	22.9616	13.1421	25.4283	46.1101	0.270599	0.604635	8.62353	0.411597	0.0143	0.288293	40084.2	4.60297	0.818977	0.0858
15	2020	Shandong	山东	0.556934	2.20337	22.9116	12.9734	25.2645	46.2117	0.277325	0.625665	8.61432	0.399951	0.0166	0.302025	40728	4.60989	0.825625	0.0924
16	2011	Henan	河南	0.863316	1.68131	17.1488	7.90698	20.9691	45.0893	0.042183	-0.715764	8.54267	0.35103	0.0241794	0.0782379	23250	4.36642	0.591722	0.0565
16	2012	Henan	河南	0.718503	1.86916	19.2562	7.82945	21.9298	42.9762	0.0611882	-0.57537	8.53895	0.368779	0.025843	0.110341	21267.2	4.32771	0.55453	0.0554
16	2013	Henan	河南	0.704669	1.84892	20.025	9.4205	23.3678	42.2751	0.0796731	-0.452059	8.53582	0.386024	0.0258888	0.115349	22684.2	4.35572	0.581442	0.0543
16	2014	Henan	河南	0.678283	1.67805	19.3641	8.52713	22.7583	41.4187	0.0928208	-0.350186	8.53346	0.40085	0.0262443	0.114233	23698	4.37471	0.599685	0.0525
16	2015	Henan	河南	0.682176	2.0167	20.4152	10.3001	23.2105	43.8839	0.11513	-0.289264	8.53208	0.41824	0.0270774	0.124191	25242	4.40212	0.62602	0.0506
16	2016	Henan	河南	0.620877	2.10114	21.8491	11.1019	25.0417	44.7321	0.130958	-0.228637	8.52754	0.426828	0.0279	0.116876	25128	4.40016	0.624131	0.05
16	2017	Henan	河南	0.593291	2.57479	23.7105	13.9379	25.6491	45.1339	0.139935	-0.151679	8.52298	0.432949	0.0261	0.117619	26432.8	4.42214	0.645252	0.0502
16	2018	Henan	河南	0.501333	2.64146	24.4665	15.2843	25.2544	45	0.151076	-0.0259973	8.51559	0.442568	0.0247	0.114036	24092	4.38187	0.606564	0.0495
16	2019	Henan	河南	0.525854	2.5985	25.2256	15.5	26.0293	46.301	0.153746	0.0425589	8.50391	0.432666	0.0238	0.104889	28532.4	4.45534	0.677143	0.0464
16	2020	Henan	河南	0.579667	2.47695	25.081	15.4225	25.9416	45.9438	0.157999	0.011889	8.49372	0.409163	0.0252	0.121994	31880	4.50352	0.72343	0.0452
17	2011	Hubei	湖北	1.71483	1.37471	20.8367	11.0817	23.6448	45.1938	0.0451612	-0.568964	8.1277	0.425998	0.0153144	0.110497	33666	4.52719	0.746173	0.0309
17	2012	Hubei	湖北	1.54604	1.53265	21.0831	11.1722	23.7403	45.1796	0.0630767	-0.475486	8.13094	0.435155	0.0160743	0.0906818	34400	4.53656	0.755172	0.0304
17	2013	Hubei	湖北	1.53075	1.42432	21.2868	11.3523	23.9644	45.2832	0.0826717	-0.392567	8.13271	0.445143	0.017208	0.0908804	37950	4.57921	0.796149	0.0305
17	2014	Hubei	湖北	1.31682	1.26856	21.5219	11.5842	24.1686	45.4807	0.0941951	-0.272544	8.13388	0.454699	0.0177871	0.0965637	36053.6	4.55695	0.774761	0.0298
17	2015	Hubei	湖北	1.26568	1.45457	21.1821	11.2976	23.8795	45.2844	0.114453	-0.132455	8.13094	0.502464	0.01886	0.0960128	37401	4.57288	0.790069	0.0292
17	2016	Hubei	湖北	1.10583	1.67663	22.1225	12.1998	24.6583	45.8762	0.129202	-0.037438	8.12711	0.508241	0.0206	0.0800946	36122.4	4.55778	0.775556	0.0295
17	2017	Hubei	湖北	1.04373	1.63988	22.4901	12.6102	24.9637	45.9824	0.140921	0.0069268	8.12534	0.522004	0.0209	0.0881295	37029.6	4.56855	0.785905	0.0296
17	2018	Hubei	湖北	1.0539	2.50997	22.7795	12.9593	25.2399	46.0375	0.153058	0.064826	8.12474	0.523241	0.0201	0.0887242	41488.4	4.61793	0.833343	0.03
17	2019	Hubei	湖北	0.946315	2.10072	22.9813	13.1646	25.4514	46.1247	0.167212	0.190234	8.12415	0.495814	0.0194	0.0860434	43368	4.63717	0.85183	0.0305
17	2020	Hubei	湖北	0.956277	3.41115	22.9528	13.0162	25.3048	46.249	0.173641	0.22273	8.08979	0.413984	0.0164	0.0988355	41544	4.61851	0.833902	0.0285
18	2011	Hunan	湖南	1.81181	1.32316	16.0194	4.77013	21.1563	43.192	0.0438665	-0.690248	8.29531	0.366505	0.0201945	0.0622047	35637.6	4.55191	0.769919	0.0275
18	2012	Hunan	湖南	1.54726	1.93394	15.9477	7.55468	17.4045	40.7563	0.0621768	-0.561054	8.29887	0.37549	0.0207442	0.0625395	34278.4	4.53502	0.753694	0.0271
18	2013	Hunan	湖南	1.40596	1.68205	16.6761	7.99863	18.8902	41.9255	0.0771976	-0.465962	8.30312	0.386225	0.0218956	0.0633246	34617	4.53929	0.757796	0.0266
18	2014	Hunan	湖南	1.30229	1.47918	16.4965	8.99531	18.3448	39.7515	0.0878984	-0.340396	8.30502	0.396618	0.0233237	0.0700485	35210.4	4.54667	0.764887	0.0257
18	2015	Hunan	湖南	1.34806	1.72275	16.6196	8.09333	18.0138	42.7296	0.10347	-0.27747	8.28911	0.388946	0.0249212	0.0631451	38962	4.59064	0.80713	0.0254
18	2016	Hunan	湖南	1.18413	1.9119	16.604	7.86533	18.4816	43.165	0.114218	-0.131293	8.27395	0.396179	0.0271	0.0552486	37360.8	4.57242	0.789621	0.025
18	2017	Hunan	湖南	1.27972	2.20199	17.022	6.4647	18.3918	43.4524	0.124912	-0.118044	8.24728	0.406858	0.0288	0.0717826	43386.2	4.63735	0.852005	0.0251
18	2018	Hunan	湖南	1.15672	2.19243	17.4189	7.14033	18.8684	43.2143	0.141327	-0.0520211	8.22646	0.415483	0.0294	0.0844288	42134.4	4.62464	0.839789	0.0253
18	2019	Hunan	湖南	1.1771	2.7688	18.2178	8.39256	20.038	43.4524	0.149462	0.0290191	8.20699	0.419699	0.0314	0.109068	46792.2	4.67017	0.883537	0.0257
18	2020	Hunan	湖南	1.10824	2.10582	18.7137	8.97177	20.2134	43.4524	0.164062	0.0694971	8.0956	0.389122	0.0347	0.116684	46304	4.66562	0.879161	0.0257
19	2011	Guangdong	广东	0.92446	2.21713	21.4813	11.24	23.1698	47.9807	0.219222	0.419247	8.71391	0.381458	0.026459	1.10879	49190.8	4.69188	0.904394	0.0935
19	2012	Guangdong	广东	0.82843	2.0961	20.7362	10.0942	22.807	47.3091	0.261163	0.700242	8.72762	0.39737	0.0260486	1.08846	47276.8	4.67465	0.887836	0.0931
19	2013	Guangdong	广东	0.764219	2.09362	21.4587	11.1564	23.9119	47.2106	0.302527	0.964577	8.74401	0.407427	0.0247353	1.0821	47744.4	4.67892	0.891942	0.0904
19	2014	Guangdong	广东	0.734654	1.99883	17.8294	10.5172	21.8333	40.4075	0.334622	1.15476	8.76842	0.419867	0.0243425	0.975263	49816.8	4.69738	0.90967	0.0941
19	2015	Guangdong	广东	0.71555	2.13148	18.6167	9.76426	22.0602	42.0853	0.371525	1.37136	8.78966	0.416505	0.0229893	0.874645	52101	4.71685	0.928376	0.0933
19	2016	Guangdong	广东	0.670267	2.24609	19.1616	10.2641	22.1008	42.1563	0.412712	1.5681	8.81031	0.411888	0.0192	0.784785	54194.4	4.73395	0.944812	0.0939
19	2017	Guangdong	广东	0.643358	2.76721	20.1323	10.6006	23.7155	42.9683	0.451781	1.5962	8.83317	0.407987	0.0172	0.75754	57712.6	4.76127	0.971055	0.0945
19	2018	Guangdong	广东	0.553841	2.92692	20.3109	10.5013	24.277	42.7769	0.513349	1.84874	8.84793	0.408799	0.0163	0.737716	53876.4	4.7314	0.942356	0.0916
19	2019	Guangdong	广东	0.535787	2.97055	20.7247	11.2378	23.5709	42.6833	0.566392	2.09355	8.85295	0.398917	0.0141	0.664168	57688.8	4.76109	0.970882	0.0924
19	2020	Guangdong	广东	0.544018	2.3703	23.1859	14.6972	27.0171	44.4472	0.597795	2.0668	8.85922	0.363015	0.0146	0.637705	60256	4.78	0.989048	0.0922
20	2011	Guangxi	广西	2.8247	2.17051	16.5909	12.0155	26.6667	44.0476	0.0314703	-0.657549	7.9848	0.333439	0.00558766	0.128703	33108	4.51993	0.7392	0.0237
20	2012	Guangxi	广西	2.65278	2.10399	18.7686	9.94832	20.7895	44.246	0.0441353	-0.633008	7.92599	0.346495	0.0036249	0.142784	34579.2	4.53881	0.75734	0.0233
20	2013	Guangxi	广西	2.60393	1.94194	20.9971	8.9502	26.1404	45.2381	0.0546252	-0.640732	7.93102	0.355234	0.00300053	0.140698	37626.6	4.57549	0.792579	0.0232
20	2014	Guangxi	广西	2.51905	1.68841	22.1823	10.1952	26.1696	45.2381	0.0639185	-0.566459	7.93559	0.36833	0.00392404	0.158926	39480.8	4.59639	0.812649	0.0235
20	2015	Guangxi	广西	2.45496	1.91427	23.5598	11.2757	28.4795	46.2302	0.0757241	-0.765737	7.86134	0.343478	0.00638322	0.189377	41251	4.61543	0.830949	0.0234
20	2016	Guangxi	广西	2.27348	2.31594	23.3471	11.1034	27.8362	46.2302	0.0859759	-0.675786	7.85671	0.34665	0.0032	0.172705	41644.8	4.61956	0.834913	0.0228
20	2017	Guangxi	广西	2.3091	2.71208	23.304	10.5005	27.0663	48.2143	0.0921434	-0.569271	7.8501	0.379954	0.003	0.208533	42772	4.63116	0.846056	0.0229
20	2018	Guangxi	广西	2.01422	3.06058	23.2609	10.6727	26.4717	48.2143	0.104476	-0.468877	7.84854	0.376539	0.0016	0.202569	40994.4	4.61272	0.828345	0.0247
20	2019	Guangxi	广西	1.86616	2.21184	23.6741	11.2757	26.4717	48.6111	0.117051	-0.354507	7.84698	0.386159	0.001	0.221606	39631.8	4.59804	0.814241	0.0263
20	2020	Guangxi	广西	2.04218	1.94676	23.8119	11.5341	26.4717	48.6111	0.12735	-0.288516	7.84698	0.353437	0.0008	0.219193	45248	4.6556	0.869535	0.027
21	2011	Hainan	海南	14.1663	1.62203	14.1322	11.6279	15.7895	42.8571	0.0249597	-0.530519	6.14249	0.326045	0.0389936	0.326594	35736.8	4.55312	0.771079	0.0039
21	2012	Hainan	海南	12.7864	1.67377	16.8595	8.52713	17.8947	42.8571	0.0423792	-0.357282	6.16521	0.332757	0.0362804	0.316606	36512	4.56244	0.780032	0.0042
21	2013	Hainan	海南	12.2921	1.27418	16.0468	7.36435	15.4971	42.2619	0.0538728	-0.269757	6.19555	0.343314	0.0352894	0.292073	39058.8	4.59172	0.808165	0.0043
21	2014	Hainan	海南	10.903	1.17991	17.9063	6.84755	19.883	43.1548	0.0669863	-0.0823466	6.22277	0.349785	0.0336132	0.278346	38168.4	4.5817	0.798544	0.0045
21	2015	Hainan	海南	10.7304	1.48124	20.9563	9.52383	25.3133	44.3878	0.0854823	-0.0426281	6.2359	0.380635	0.041475	0.234938	39732	4.59914	0.815295	0.0048
21	2016	Hainan	海南	9.52847	1.76509	21.1924	9.85606	25.5639	44.3878	0.0896455	0.0385036	6.24055	0.381748	0.0363	0.185976	38620.8	4.58682	0.80346	0.0048
21	2017	Hainan	海南	9.04409	1.82884	21.4876	10.8527	25.3133	43.6224	0.0930843	0.0484177	6.26505	0.387537	0.0349	0.156869	40359.6	4.60595	0.821834	0.0048
21	2018	Hainan	海南	9.32846	2.70328	21.2515	10.8527	22.807	43.6224	0.0987598	-0.0359995	6.2832	0.383419	0.0112	0.174383	45075.6	4.65394	0.867943	0.0047
21	2019	Hainan	海南	8.41277	2.26467	21.4286	11.6279	21.3033	44.1326	0.102717	-0.0595634	6.28434	0.367513	0.0198	0.170909	44662.8	4.64995	0.864104	0.0049
21	2020	Hainan	海南	7.87508	1.95131	20.8383	11.1849	19.7995	44.1326	0.104405	-0.149643	6.29336	0.356916	0.0378	0.169436	43568	4.63917	0.853749	0.0048
22	2011	Chongqing	重庆	3.64022	1.89799	17.5188	9.52267	21.4944	45.1173	0.0359796	-0.696342	7.36963	0.3778	0.0375862	0.188432	36443.6	4.56162	0.77925	0.0152
22	2012	Chongqing	重庆	3.3224	1.59785	18.7195	8.9392	21.032	43.8052	0.0507986	-0.605987	7.38143	0.385903	0.019498	0.294355	37907.2	4.57872	0.795678	0.0146
22	2013	Chongqing	重庆	2.76427	1.36803	21.292	11.3595	23.9672	45.2982	0.0686702	-0.494959	7.38937	0.395502	0.0200745	0.332798	35336.4	4.54822	0.766377	0.0152
22	2014	Chongqing	重庆	2.39816	1.19336	19.32	9.41615	22.4445	43.0438	0.0838983	-0.36652	7.39764	0.400397	0.0182333	0.411017	34204	4.53408	0.752788	0.0156
22	2015	Chongqing	重庆	2.4963	1.70657	19.9518	9.73527	22.6999	45.3407	0.102949	-0.293484	7.40696	0.487846	0.0149469	0.295095	39235	4.59367	0.810043	0.0154
22	2016	Chongqing	重庆	2.07713	1.7681	20.5992	10.3691	23.3884	45.5764	0.118808	-0.135409	7.41356	0.492001	0.0104	0.234958	36849.6	4.56643	0.783872	0.0155
22	2017	Chongqing	重庆	2.19889	1.83296	21.5864	11.4681	24.1262	45.9148	0.131739	-0.0539635	7.41417	0.502937	0.0079	0.231507	42712.8	4.63056	0.845478	0.0157
22	2018	Chongqing	重庆	2.11916	2.35047	22.775	12.9559	25.2331	46.0567	0.145519	0.037368	7.41652	0.525713	0.0106	0.25678	43152.8	4.63501	0.849754	0.0162
22	2019	Chongqing	重庆	1.78861	2.47705	23.0118	13.1616	25.4627	46.2197	0.156419	0.0930084	7.41948	0.492748	0.0069	0.245332	42221.4	4.62553	0.84065	0.016
22	2020	Chongqing	重庆	1.8286	2.44125	23.0073	13.0549	25.373	46.3605	0.167732	0.14596	7.42417	0.471435	0.0058	0.259817	45720	4.66011	0.873865	0.0158
23	2011	Sichuan	四川	1.14024	1.63543	20.8478	11.0899	23.6469	45.1978	0.0512637	-0.586001	8.44462	0.394299	0.0291229	0.146595	23975.4	4.37977	0.60454	0.0372
23	2012	Sichuan	四川	1.02946	2.17581	21.0906	11.18	23.7451	45.1878	0.0705145	-0.474164	8.44139	0.403053	0.025916	0.156389	24576	4.39051	0.614863	0.0369
23	2013	Sichuan	四川	0.957288	2.00594	21.2923	11.3591	23.9675	45.2948	0.0908255	-0.337911	8.44118	0.41683	0.0241336	0.151532	25264.8	4.40252	0.626396	0.0365
23	2014	Sichuan	四川	0.937194	1.72357	21.5269	11.5909	24.1728	45.4931	0.104846	-0.193352	8.44204	0.434283	0.0221452	0.151119	26744.4	4.42723	0.650142	0.0362
23	2015	Sichuan	四川	0.823609	1.7077	21.7777	11.8381	24.3485	45.779	0.128344	-0.0787354	8.44505	0.460332	0.0207165	0.106087	24752	4.39361	0.617841	0.035
23	2016	Sichuan	四川	0.842107	1.97936	22.1224	12.201	24.6561	45.8892	0.14426	0.0919861	8.44613	0.471229	0.0161	0.0994418	27734.4	4.44302	0.665308	0.0352
23	2017	Sichuan	四川	0.731391	2.45263	22.4869	12.6077	24.9605	45.9957	0.164257	0.126917	8.44827	0.470641	0.0148	0.124375	27047	4.43212	0.654836	0.035
23	2018	Sichuan	四川	0.67241	2.81297	22.768	12.9477	25.2255	46.0529	0.181632	0.206715	8.45319	0.475457	0.0146	0.146281	27352.4	4.437	0.659521	0.0356
23	2019	Sichuan	四川	0.559703	2.66089	22.9968	13.1451	25.4475	46.2098	0.202025	0.383708	8.45829	0.457849	0.0137	0.145619	26091	4.41649	0.639822	0.0363
23	2020	Sichuan	四川	0.588163	2.32385	22.9015	12.9514	25.2722	46.2931	0.214809	0.344277	8.46485	0.428506	0.0143	0.165916	28584	4.45612	0.677897	0.0381
24	2011	Guizhou	贵州	5.67498	1.3737	16.2994	9.30233	28.0702	45.0397	0.0169863	-0.908611	7.47986	0.333208	0.0058337	0.0553644	32357.8	4.50998	0.729637	0.0201
24	2012	Guizhou	贵州	5.0922	1.91531	18.9256	8.30563	24.7368	43.2143	0.0300668	-0.796988	7.48437	0.33074	0.00452475	0.0610924	34892.8	4.54274	0.761107	0.0211
24	2013	Guizhou	贵州	4.41531	1.79242	19.5718	8.01032	25.0399	43.9935	0.0434655	-0.662182	7.49332	0.321658	0.0044168	0.0634885	35706	4.55274	0.770719	0.0211
24	2014	Guizhou	贵州	4.13736	1.77383	17.1676	8.26872	22.1691	41.0714	0.0535337	-0.546629	7.50659	0.316941	0.00308685	0.0714044	38338.4	4.58363	0.800398	0.0211
24	2015	Guizhou	贵州	3.99569	2.2839	18.2507	8.44959	22.076	44.7917	0.0699274	-0.519229	7.51861	0.468952	0.00248725	0.0724775	41965	4.62289	0.838109	0.0206
24	2016	Guizhou	贵州	3.41575	2.36758	18.2163	8.68215	21.6374	45.2381	0.0823437	-0.369585	7.52779	0.479922	0.0055	0.0321469	40226.4	4.60451	0.820455	0.0208
24	2017	Guizhou	贵州	3.15328	2.41885	20.7989	11.1628	22.5146	46.3729	0.0887649	-0.323551	7.53956	0.476294	0.0041	0.0406884	42698	4.63041	0.845333	0.022
24	2018	Guizhou	贵州	2.83541	2.49972	19.8347	6.58915	27.193	42.8572	0.0974678	-0.272444	7.54221	0.479857	0.0027	0.0339792	41982.4	4.62307	0.838282	0.0215
24	2019	Guizhou	贵州	2.54336	2.28362	21.2121	10.4651	21.6374	44.5927	0.101545	-0.225002	7.54327	0.44535	0.0028	0.0270199	42650.4	4.62992	0.844868	0.0213
24	2020	Guizhou	贵州	2.28827	1.85188	20.8678	9.81912	21.6374	45.5357	0.104774	-0.232088	7.54539	0.439422	0.0017	0.030606	40792	4.61057	0.82628	0.0211
25	2011	Yunnan	云南	1.181	1.35898	17.5356	9.40497	21.5126	45.0455	0.0253186	-0.782492	7.95297	0.349248	0.0126226	0.116412	10502.8	4.02131	0.260164	0.0256
25	2012	Yunnan	云南	1.15156	1.60341	18.6945	8.88523	21.0739	43.6976	0.0386802	-0.699357	7.9498	0.34899	0.0134033	0.128667	11872	4.07452	0.311292	0.0265
25	2013	Yunnan	云南	1.08212	1.70406	18.9423	9.00694	21.8537	43.1983	0.0507918	-0.603962	7.9498	0.347574	0.0131639	0.132442	12804	4.10735	0.342824	0.0273
25	2014	Yunnan	云南	0.996552	1.70052	19.2901	9.3717	22.4301	42.9722	0.0607702	-0.489974	7.95823	0.361533	0.0129715	0.141926	12770.4	4.1062	0.341728	0.0275
25	2015	Yunnan	云南	0.530943	1.80888	19.6221	9.45011	22.3185	44.9029	0.0779767	-0.409555	7.94556	0.46925	0.0136832	0.112005	7231	3.8592	0.104427	0.0253
25	2016	Yunnan	云南	0.924074	1.93355	20.2513	10.0751	23.0316	45.1319	0.0849421	-0.33497	7.95683	0.488403	0.0039	0.0893925	13665.6	4.13563	0.369996	0.0236
25	2017	Yunnan	云南	0.516489	1.771	21.1029	10.9328	23.6574	45.5207	0.0892194	-0.316456	7.94839	0.500406	0.004	0.0969176	8458.2	3.92728	0.169832	0.0244
25	2018	Yunnan	云南	0.668146	2.35984	22.7603	12.9376	25.2231	46.0422	0.0971984	-0.31678	7.9452	0.514359	0.0039	0.110498	11947.2	4.07727	0.313927	0.0243
25	2019	Yunnan	云南	0.379189	2.23957	22.9586	13.1375	25.4283	46.145	0.103848	-0.272713	7.94165	0.437405	0.0021	0.100082	8806.2	3.94479	0.186654	0.025
25	2020	Yunnan	云南	0.442706	2.25686	22.8699	12.9204	25.249	46.25	0.110955	-0.237043	7.93952	0.399353	0.0021	0.110066	10856	4.03567	0.273965	0.027
26	2011	Shanxi	陕西	2.8051	1.95134	17.8638	9.60973	22.1748	45.4343	0.0354476	-0.625208	7.64348	0.311741	0.0121564	0.0756086	35098.2	4.54528	0.763555	0.0209
26	2012	Shanxi	陕西	2.32865	2.12947	18.9971	9.1139	21.4347	44.1069	0.0503648	-0.517701	7.6454	0.316985	0.0128231	0.0646333	33657.6	4.52708	0.746069	0.0215
26	2013	Shanxi	陕西	2.32063	1.87649	19.2813	9.23644	22.2219	43.6307	0.0662294	-0.386102	7.64492	0.323657	0.0140561	0.076923	37606.8	4.57527	0.792359	0.0216
26	2014	Shanxi	陕西	2.06691	1.99115	19.6996	9.70655	22.9108	43.4303	0.0782291	-0.25938	7.65017	0.33458	0.0144996	0.0950227	36563.6	4.56305	0.780622	0.022
26	2015	Shanxi	陕西	2.09784	2.05863	19.9321	9.71971	22.6864	45.2158	0.095468	-0.209021	7.65302	0.380599	0.0159709	0.105404	37807	4.57757	0.794574	0.0215
26	2016	Shanxi	陕西	1.9047	2.35012	20.575	10.3623	23.3793	45.4561	0.108509	-0.0984109	7.65492	0.395921	0.0172	0.102537	36950.4	4.56762	0.785012	0.0227
26	2017	Shanxi	陕西	1.90045	2.64724	21.5554	11.4281	24.1201	45.8251	0.116765	-0.0451586	7.65492	0.393227	0.0182	0.123766	41617.6	4.61928	0.83464	0.0237
26	2018	Shanxi	陕西	1.73748	2.95294	22.7486	12.92	25.2188	46.0332	0.129309	0.0083396	7.65539	0.389156	0.0185	0.144339	42461.2	4.62799	0.843013	0.0231
26	2019	Shanxi	陕西	1.63571	2.53894	22.7229	12.8196	25.189	46.1279	0.143306	0.0557726	7.65634	0.395957	0.0207	0.13649	42190.2	4.62521	0.840342	0.0264
26	2020	Shanxi	陕西	1.6613	2.16652	22.9293	12.952	25.3146	46.2572	0.149226	0.0501602	7.65207	0.366891	0.0222	0.143843	43496	4.63845	0.853059	0.0232
27	2011	Gansu	甘肃	7.15788	2.15339	11.4325	1.5504	4.67837	41.0714	0.0169796	-0.85507	7.22911	0.353141	0.000900563	0.112295	35935.2	4.55552	0.773388	0.0196
27	2012	Gansu	甘肃	5.87873	2.1772	16.6261	5.76132	16.3127	43.1676	0.0304407	-0.732473	7.21377	0.365368	0.00068262	0.0994407	33216	4.52135	0.740558	0.0201
27	2013	Gansu	甘肃	5.96542	1.99681	17.9808	6.5219	19.709	43.2224	0.0417059	-0.636828	7.20934	0.374177	0.000697417	0.100138	37765.2	4.57709	0.794113	0.0201
27	2014	Gansu	甘肃	5.64444	2.19892	18.2704	7.36125	19.7967	42.4175	0.0506377	-0.530736	7.20638	0.390284	0.000901363	0.0776349	38590	4.58647	0.803127	0.0197
27	2015	Gansu	甘肃	5.35439	2.30615	18.7237	6.81329	19.7752	45.7453	0.0656929	-0.456382	7.20489	0.403089	0.00101227	0.0729397	36358	4.5606	0.778269	0.0193
27	2016	Gansu	甘肃	5.24873	2.14573	19.4663	8.12495	19.8768	45.7794	0.0686286	-0.360549	7.20117	0.414451	0.0011	0.0630339	37792.8	4.57741	0.794417	0.0178
27	2017	Gansu	甘肃	5.65522	2.45711	19.3758	7.62778	20.3362	45.9068	0.0724384	-0.374923	7.19818	0.429791	0.0004	0.0457868	42187.4	4.62518	0.840314	0.0185
27	2018	Gansu	甘肃	5.2912	2.95389	20.1362	8.70821	21.0682	45.9229	0.0782869	-0.34952	7.19818	0.416635	0.0004	0.048254	43631.6	4.6398	0.854358	0.0187
27	2019	Gansu	甘肃	5.33313	2.93113	20.2434	9.15652	20.467	45.9449	0.0830713	-0.382214	7.19519	0.424429	0.0006	0.0436786	46495.8	4.66741	0.880886	0.0178
27	2020	Gansu	甘肃	5.272	2.35832	20.5795	9.46333	21.1402	45.9619	0.0874244	-0.339907	7.19369	0.402852	0.0007	0.0423034	47536	4.67702	0.890117	0.0183
28	2011	Qinghai	青海	4.03451	1.63243	17.0799	7.36435	20	45.5357	0.0173677	-0.710168	5.73392	0.24748	0.00653443	0.0357197	6739.4	3.82862	0.0750516	0.0119
28	2012	Qinghai	青海	4.71498	1.38956	16.3912	6.97676	16.9591	42.2619	0.0241238	-0.652403	5.73944	0.253652	0.00686009	0.0385866	8928	3.95075	0.192386	0.0121
28	2013	Qinghai	青海	3.73533	1.23076	16.6322	7.75195	17.5439	42.1875	0.0358761	-0.57194	5.75006	0.258994	0.00273529	0.0409388	7926.6	3.89909	0.142749	0.0127
28	2014	Qinghai	青海	3.47481	1.21693	16.4773	7.62273	16.886	42.4107	0.042263	-0.489302	5.75985	0.269524	0.00133613	0.045815	8003.6	3.90329	0.146782	0.013
28	2015	Qinghai	青海	3.91552	1.56176	16.4371	7.36433	17.5439	43.254	0.0593539	-0.419977	5.77272	0.287375	0.00141727	0.0498486	9464	3.97607	0.216711	0.0116
28	2016	Qinghai	青海	3.20188	1.67778	17.3554	6.53377	19.2982	45.0397	0.0629068	-0.321155	5.78161	0.299282	0.0004	0.0394848	8236.8	3.91576	0.158765	0.0107
28	2017	Qinghai	青海	4.44875	2.11039	17.8145	6.20156	20.4678	45.4365	0.0660693	-0.308345	5.78987	0.321126	0.0005	0.0168568	11677.2	4.06734	0.304389	0.0109
28	2018	Qinghai	青海	2.83021	2.48408	18.4573	6.39536	22.4171	45.8333	0.0708044	-0.308364	5.79685	0.314076	0.0001	0.0167945	8109.2	3.90898	0.152251	0.0107
28	2019	Qinghai	青海	3.1716	2.46677	18.4573	6.49225	22.4171	45.0397	0.0730864	-0.378168	5.7997	0.319796	0.0016	0.0126719	9406.8	3.97344	0.214182	0.0099
28	2020	Qinghai	青海	4.89168	2.30469	18.4573	6.49225	22.4171	45.0397	0.0765871	-0.362553	5.63121	0.291857	0.0006	0.00757242	14704	4.16744	0.400553	0.0099
29	2011	Ningxia	宁夏	3.38872	1.39403	16.3223	11.2403	31.5789	41.5179	0.0208483	-0.57482	5.84932	0.245218	0.00620622	0.070227	7123.8	3.85271	0.0981955	0.0154
29	2012	Ningxia	宁夏	3.94723	1.73532	19.3182	7.55813	25	40.625	0.0335441	-0.497798	5.84201	0.252211	0.00588303	0.059766	9241.6	3.96575	0.206789	0.015
29	2013	Ningxia	宁夏	3.17508	1.42484	18.843	10.8527	18.5965	42.5	0.0426953	-0.472471	5.84354	0.259353	0.0035594	0.0773122	8184	3.91297	0.156082	0.0152
29	2014	Ningxia	宁夏	2.59685	1.28096	19.7521	12.5969	20.3509	41.4286	0.0521884	-0.366457	5.84064	0.267868	0.0020633	0.121316	7146.8	3.85411	0.0995404	0.0153
29	2015	Ningxia	宁夏	4.75038	1.65736	18.9256	10.4651	19.6491	42.5	0.0656863	-0.368022	5.83773	0.357102	0.00398696	0.0799843	13832	4.14088	0.375046	0.0154
29	2016	Ningxia	宁夏	4.37646	1.70872	20.5785	12.0155	23.8596	42.5	0.0674573	-0.280516	5.83773	0.356815	0.0053	0.0681818	13867.2	4.14199	0.376106	0.0148
29	2017	Ningxia	宁夏	3.93686	2.27835	19.0909	7.1318	21.7544	43.9286	0.0726968	-0.271347	5.84064	0.364071	0.0061	0.0987501	13556.8	4.13216	0.366661	0.0155
29	2018	Ningxia	宁夏	2.58039	2.56137	19.5041	8.52714	21.7544	42.5	0.0778891	-0.236761	5.84354	0.358984	0.0038	0.0674489	9560.8	3.98049	0.220957	0.0154
29	2019	Ningxia	宁夏	2.13286	2.49688	19.0909	7.28684	22.807	42.5	0.0789298	-0.324973	5.83773	0.373325	0.0046	0.0642209	7995	3.90282	0.146333	0.015
29	2020	Ningxia	宁夏	2.65677	1.88691	18.595	7.28684	20.7018	42.5	0.0820677	-0.311564	5.84064	0.331943	0.0048	0.0313163	10416	4.0177	0.256702	0.0138
30	2011	Xinjiang	新疆	1.31128	2.39396	20.8375	11.0834	23.6451	45.1961	0.0213205	-0.676275	7.11883	0.251496	0.00327335	0.222975	8667.6	3.9379	0.180035	0.0178
30	2012	Xinjiang	新疆	0.860404	2.15534	21.083	11.1759	23.7367	45.1783	0.0344615	-0.63761	7.12769	0.255299	0.00343115	0.211698	6457.6	3.81007	0.0572304	0.022
30	2013	Xinjiang	新疆	1.04036	1.82185	21.2866	11.3546	23.9617	45.2823	0.0454697	-0.629562	7.13887	0.258117	0.00352808	0.202151	8784.6	3.94372	0.18563	0.0288
30	2014	Xinjiang	新疆	1.33383	2.2604	21.5188	11.5835	24.1629	45.4764	0.0508946	-0.607922	7.14283	0.262739	0.00276224	0.183303	12369.2	4.09234	0.32841	0.0342
30	2015	Xinjiang	新疆	1.12228	2.3613	21.7711	11.8307	24.3424	45.7632	0.0637549	-0.627659	7.16395	0.297014	0.00302243	0.13138	10465	4.01974	0.25866	0.0379
30	2016	Xinjiang	新疆	0.862535	1.86416	22.1169	12.194	24.6535	45.87	0.0630847	-0.616587	7.18539	0.311429	0.0028	0.121408	8323.2	3.92029	0.163119	0.0388
30	2017	Xinjiang	新疆	0.82827	2.53075	22.4767	12.5945	24.9529	45.9738	0.068364	-0.632427	7.19744	0.29864	0.0012	0.128191	9013.2	3.95488	0.196348	0.0317
30	2018	Xinjiang	新疆	0.967516	2.45826	22.7597	12.9354	25.2192	46.0265	0.0771655	-0.552673	7.19369	0.281095	0.0011	0.108489	11802.8	4.07199	0.308853	0.0389
30	2019	Xinjiang	新疆	0.600039	2.48753	22.9374	13.1118	25.4036	46.0933	0.0811883	-0.576441	7.20266	0.266013	0.0017	0.120279	8158.8	3.91163	0.154795	0.0396
30	2020	Xinjiang	新疆	1.03786	2.35059	22.8895	12.9491	25.248	46.2057	0.0842795	-0.575649	7.21229	0.221959	0.0011	0.106832	14320	4.15594	0.389512	0.0399
